# Supplementary material for: Gene Ontology and KEGG Pathway Enrichment Analysis of a Drug Target-Based Classification System
Source: PubMed Central journal article supplement (PMC4423955; doi:10.1371/journal.pone.0126492), 2015-05-07
Supplement: pone.0126492.s001.pdf [file pone.0126492.s001.pdf]

**S1 Table.** The codes of 2,015 drug compounds and their target-based classes.

| <b>Compound ID</b> | <b>Target-based Class</b> |
|--------------------|---------------------------|
| CID000000237       | E                         |
| CID000000338       | E                         |
| CID000000359       | E                         |
| CID000000564       | E                         |
| CID000000681       | GPCR                      |
| CID000000750       | IC                        |
| CID000000774       | GPCR                      |
| CID000000785       | E                         |
| CID000000896       | GPCR                      |
| CID000000951       | GPCR                      |
| CID000001046       | P                         |
| CID000001234       | IC                        |
| CID000001613       | E                         |
| CID000001676       | GPCR                      |
| CID000001775       | IC                        |
| CID000001783       | P                         |
| CID000001935       | E                         |
| CID000001967       | E                         |
| CID000001978       | GPCR                      |
| CID000001979       | GPCR                      |

|              |      |
|--------------|------|
| CID000001981 | E    |
| CID000001983 | E    |
| CID000001986 | E    |
| CID000001990 | E    |
| CID000001993 | GPCR |
| CID000002083 | GPCR |
| CID000002088 | E    |
| CID000002092 | GPCR |
| CID000002097 | E    |
| CID000002099 | GPCR |
| CID000002118 | IC   |
| CID000002119 | GPCR |
| CID000002120 | E    |
| CID000002130 | P    |
| CID000002131 | E    |
| CID000002132 | IC   |
| CID000002137 | IC   |
| CID000002145 | E    |
| CID000002160 | IC   |
| CID000002162 | IC   |
| CID000002163 | IC   |
| CID000002165 | E    |

|              |      |
|--------------|------|
| CID000002169 | GPCR |
| CID000002170 | IC   |
| CID000002176 | E    |
| CID000002179 | E    |
| CID000002187 | E    |
| CID000002200 | GPCR |
| CID000002216 | GPCR |
| CID000002218 | IC   |
| CID000002225 | IC   |
| CID000002239 | GPCR |
| CID000002244 | E    |
| CID000002247 | GPCR |
| CID000002249 | GPCR |
| CID000002264 | GPCR |
| CID000002266 | P    |
| CID000002267 | GPCR |
| CID000002273 | T    |
| CID000002284 | GPCR |
| CID000002294 | IC   |
| CID000002309 | GPCR |
| CID000002315 | T    |
| CID000002327 | E    |

|              |      |
|--------------|------|
| CID000002337 | IC   |
| CID000002343 | T    |
| CID000002351 | IC   |
| CID000002366 | GPCR |
| CID000002369 | GPCR |
| CID000002370 | GPCR |
| CID000002372 | GPCR |
| CID000002375 | NR   |
| CID000002378 | P    |
| CID000002381 | GPCR |
| CID000002405 | GPCR |
| CID000002431 | IC   |
| CID000002435 | GPCR |
| CID000002441 | IC   |
| CID000002448 | GPCR |
| CID000002449 | GPCR |
| CID000002465 | GPCR |
| CID000002468 | PK   |
| CID000002471 | T    |
| CID000002472 | GPCR |
| CID000002473 | GPCR |
| CID000002474 | IC   |

|              |      |
|--------------|------|
| CID000002475 | GPCR |
| CID000002477 | GPCR |
| CID000002482 | IC   |
| CID000002484 | P    |
| CID000002520 | IC   |
| CID000002540 | GPCR |
| CID000002541 | GPCR |
| CID000002551 | GPCR |
| CID000002554 | IC   |
| CID000002564 | GPCR |
| CID000002577 | E    |
| CID000002581 | E    |
| CID000002583 | GPCR |
| CID000002585 | GPCR |
| CID000002662 | E    |
| CID000002663 | GPCR |
| CID000002678 | GPCR |
| CID000002712 | IC   |
| CID000002720 | T    |
| CID000002725 | GPCR |
| CID000002726 | GPCR |
| CID000002727 | IC   |

|              |      |
|--------------|------|
| CID000002732 | T    |
| CID000002747 | IC   |
| CID000002750 | NR   |
| CID000002754 | E    |
| CID000002755 | GPCR |
| CID000002756 | GPCR |
| CID000002762 | P    |
| CID000002763 | NR   |
| CID000002764 | P    |
| CID000002769 | GPCR |
| CID000002771 | IC   |
| CID000002780 | GPCR |
| CID000002783 | GPCR |
| CID000002789 | IC   |
| CID000002796 | NR   |
| CID000002798 | IC   |
| CID000002801 | IC   |
| CID000002802 | IC   |
| CID000002803 | GPCR |
| CID000002809 | IC   |
| CID000002811 | IC   |
| CID000002812 | P    |

|              |      |
|--------------|------|
| CID000002816 | IC   |
| CID000002818 | GPCR |
| CID000002880 | P    |
| CID000002905 | GPCR |
| CID000002913 | GPCR |
| CID000002955 | P    |
| CID000002995 | IC   |
| CID000002997 | IC   |
| CID000002998 | IC   |
| CID000003007 | IC   |
| CID000003009 | E    |
| CID000003016 | IC   |
| CID000003019 | IC   |
| CID000003025 | IC   |
| CID000003032 | E    |
| CID000003038 | E    |
| CID000003039 | E    |
| CID000003042 | GPCR |
| CID000003059 | E    |
| CID000003089 | GPCR |
| CID000003100 | GPCR |
| CID000003103 | GPCR |

|              |      |
|--------------|------|
| CID000003105 | GPCR |
| CID000003108 | E    |
| CID000003114 | IC   |
| CID000003117 | E    |
| CID000003148 | GPCR |
| CID000003151 | GPCR |
| CID000003152 | E    |
| CID000003157 | GPCR |
| CID000003162 | GPCR |
| CID000003168 | GPCR |
| CID000003180 | IC   |
| CID000003191 | GPCR |
| CID000003198 | P    |
| CID000003202 | E    |
| CID000003219 | GPCR |
| CID000003229 | P    |
| CID000003241 | GPCR |
| CID000003261 | IC   |
| CID000003278 | T    |
| CID000003290 | GPCR |
| CID000003291 | IC   |
| CID000003295 | E    |

|              |      |
|--------------|------|
| CID000003306 | GPCR |
| CID000003307 | IC   |
| CID000003308 | E    |
| CID000003324 | P    |
| CID000003333 | IC   |
| CID000003339 | NR   |
| CID000003340 | GPCR |
| CID000003342 | E    |
| CID000003343 | GPCR |
| CID000003345 | GPCR |
| CID000003348 | GPCR |
| CID000003354 | E    |
| CID000003355 | IC   |
| CID000003357 | P    |
| CID000003360 | E    |
| CID000003365 | P    |
| CID000003369 | IC   |
| CID000003371 | E    |
| CID000003372 | GPCR |
| CID000003380 | IC   |
| CID000003385 | E    |
| CID000003386 | IC   |

|              |      |
|--------------|------|
| CID000003388 | GPCR |
| CID000003389 | GPCR |
| CID000003393 | IC   |
| CID000003394 | E    |
| CID000003395 | E    |
| CID000003396 | IC   |
| CID000003397 | NR   |
| CID000003400 | IC   |
| CID000003406 | E    |
| CID000003410 | GPCR |
| CID000003414 | P    |
| CID000003436 | E    |
| CID000003446 | IC   |
| CID000003447 | E    |
| CID000003448 | IC   |
| CID000003450 | IC   |
| CID000003454 | P    |
| CID000003463 | NR   |
| CID000003467 | P    |
| CID000003475 | IC   |
| CID000003476 | IC   |
| CID000003478 | IC   |

|              |      |
|--------------|------|
| CID000003487 | IC   |
| CID000003488 | IC   |
| CID000003494 | GPCR |
| CID000003519 | GPCR |
| CID000003547 | PK   |
| CID000003559 | GPCR |
| CID000003563 | IC   |
| CID000003604 | IC   |
| CID000003608 | IC   |
| CID000003609 | GPCR |
| CID000003627 | GPCR |
| CID000003639 | T    |
| CID000003647 | T    |
| CID000003655 | E    |
| CID000003657 | E    |
| CID000003658 | GPCR |
| CID000003671 | GPCR |
| CID000003672 | E    |
| CID000003673 | E    |
| CID000003675 | E    |
| CID000003676 | IC   |
| CID000003696 | IC   |

|              |      |
|--------------|------|
| CID000003698 | E    |
| CID000003699 | E    |
| CID000003702 | T    |
| CID000003715 | E    |
| CID000003748 | E    |
| CID000003749 | GPCR |
| CID000003759 | E    |
| CID000003760 | P    |
| CID000003762 | GPCR |
| CID000003775 | GPCR |
| CID000003779 | GPCR |
| CID000003783 | GPCR |
| CID000003784 | IC   |
| CID000003792 | E    |
| CID000003821 | IC   |
| CID000003822 | GPCR |
| CID000003825 | E    |
| CID000003826 | E    |
| CID000003827 | GPCR |
| CID000003869 | GPCR |
| CID000003878 | IC   |
| CID000003883 | E    |

|              |      |
|--------------|------|
| CID000003899 | E    |
| CID000003902 | E    |
| CID000003911 | GPCR |
| CID000003914 | GPCR |
| CID000003926 | IC   |
| CID000003932 | IC   |
| CID000003936 | P    |
| CID000003947 | IC   |
| CID000003948 | P    |
| CID000003949 | IC   |
| CID000003957 | GPCR |
| CID000003958 | IC   |
| CID000003961 | GPCR |
| CID000003963 | P    |
| CID000003964 | GPCR |
| CID000003965 | E    |
| CID000003969 | GPCR |
| CID000003995 | GPCR |
| CID000004004 | E    |
| CID000004008 | IC   |
| CID000004011 | IC   |
| CID000004020 | IC   |

|              |      |
|--------------|------|
| CID000004032 | IC   |
| CID000004034 | GPCR |
| CID000004036 | E    |
| CID000004041 | IC   |
| CID000004044 | E    |
| CID000004047 | T    |
| CID000004051 | E    |
| CID000004054 | IC   |
| CID000004057 | GPCR |
| CID000004058 | GPCR |
| CID000004060 | IC   |
| CID000004062 | IC   |
| CID000004064 | IC   |
| CID000004066 | GPCR |
| CID000004086 | GPCR |
| CID000004091 | PK   |
| CID000004097 | GPCR |
| CID000004099 | IC   |
| CID000004100 | E    |
| CID000004121 | T    |
| CID000004134 | GPCR |
| CID000004167 | GPCR |

|              |      |
|--------------|------|
| CID000004168 | GPCR |
| CID000004170 | T    |
| CID000004171 | GPCR |
| CID000004174 | E    |
| CID000004177 | IC   |
| CID000004178 | IC   |
| CID000004184 | GPCR |
| CID000004189 | P    |
| CID000004192 | IC   |
| CID000004195 | GPCR |
| CID000004197 | E    |
| CID000004201 | IC   |
| CID000004205 | GPCR |
| CID000004211 | E    |
| CID000004212 | E    |
| CID000004235 | E    |
| CID000004237 | E    |
| CID000004249 | GPCR |
| CID000004257 | GPCR |
| CID000004259 | P    |
| CID000004260 | GPCR |
| CID000004261 | E    |

|              |      |
|--------------|------|
| CID000004380 | E    |
| CID000004409 | E    |
| CID000004416 | NR   |
| CID000004417 | GPCR |
| CID000004418 | GPCR |
| CID000004421 | P    |
| CID000004436 | GPCR |
| CID000004440 | GPCR |
| CID000004449 | GPCR |
| CID000004454 | P    |
| CID000004456 | E    |
| CID000004463 | P    |
| CID000004472 | E    |
| CID000004473 | IC   |
| CID000004485 | IC   |
| CID000004486 | IC   |
| CID000004493 | NR   |
| CID000004494 | IC   |
| CID000004495 | E    |
| CID000004496 | IC   |
| CID000004497 | IC   |
| CID000004499 | IC   |

|              |      |
|--------------|------|
| CID000004500 | IC   |
| CID000004506 | IC   |
| CID000004507 | IC   |
| CID000004528 | IC   |
| CID000004539 | P    |
| CID000004543 | IC   |
| CID000004567 | GPCR |
| CID000004583 | P    |
| CID000004585 | GPCR |
| CID000004593 | E    |
| CID000004594 | E    |
| CID000004595 | GPCR |
| CID000004601 | GPCR |
| CID000004613 | GPCR |
| CID000004614 | E    |
| CID000004628 | P    |
| CID000004631 | GPCR |
| CID000004634 | GPCR |
| CID000004636 | GPCR |
| CID000004641 | E    |
| CID000004642 | GPCR |
| CID000004644 | E    |

|              |      |
|--------------|------|
| CID000004673 | E    |
| CID000004679 | E    |
| CID000004680 | E    |
| CID000004688 | E    |
| CID000004725 | P    |
| CID000004726 | T    |
| CID000004737 | IC   |
| CID000004747 | GPCR |
| CID000004748 | GPCR |
| CID000004760 | E    |
| CID000004761 | GPCR |
| CID000004763 | IC   |
| CID000004768 | GPCR |
| CID000004781 | E    |
| CID000004820 | IC   |
| CID000004822 | GPCR |
| CID000004823 | E    |
| CID000004826 | IC   |
| CID000004828 | GPCR |
| CID000004829 | NR   |
| CID000004830 | GPCR |
| CID000004831 | P    |

|              |      |
|--------------|------|
| CID000004839 | GPCR |
| CID000004841 | GPCR |
| CID000004843 | T    |
| CID000004845 | GPCR |
| CID000004848 | GPCR |
| CID000004849 | T    |
| CID000004870 | T    |
| CID000004887 | GPCR |
| CID000004888 | E    |
| CID000004890 | IC   |
| CID000004893 | GPCR |
| CID000004906 | IC   |
| CID000004913 | IC   |
| CID000004914 | IC   |
| CID000004916 | GPCR |
| CID000004917 | GPCR |
| CID000004919 | GPCR |
| CID000004922 | GPCR |
| CID000004926 | GPCR |
| CID000004927 | GPCR |
| CID000004932 | IC   |
| CID000004934 | GPCR |

|              |      |
|--------------|------|
| CID000004935 | IC   |
| CID000004942 | GPCR |
| CID000004943 | IC   |
| CID000004946 | GPCR |
| CID000004991 | E    |
| CID000004992 | GPCR |
| CID000004993 | P    |
| CID000004999 | IC   |
| CID000005002 | GPCR |
| CID000005029 | E    |
| CID000005035 | NR   |
| CID000005069 | IC   |
| CID000005071 | P    |
| CID000005073 | GPCR |
| CID000005074 | GPCR |
| CID000005078 | GPCR |
| CID000005090 | E    |
| CID000005095 | GPCR |
| CID000005105 | GPCR |
| CID000005147 | E    |
| CID000005152 | GPCR |
| CID000005160 | GPCR |

|              |      |
|--------------|------|
| CID000005161 | E    |
| CID000005193 | IC   |
| CID000005205 | GPCR |
| CID000005210 | IC   |
| CID000005212 | E    |
| CID000005214 | P    |
| CID000005215 | P    |
| CID000005233 | E    |
| CID000005245 | E    |
| CID000005265 | GPCR |
| CID000005278 | E    |
| CID000005311 | E    |
| CID000005314 | IC   |
| CID000005318 | P    |
| CID000005320 | P    |
| CID000005323 | P    |
| CID000005328 | P    |
| CID000005329 | P    |
| CID000005333 | P    |
| CID000005335 | P    |
| CID000005343 | P    |
| CID000005344 | P    |

|              |      |
|--------------|------|
| CID000005355 | GPCR |
| CID000005357 | GPCR |
| CID000005358 | GPCR |
| CID000005360 | IC   |
| CID000005374 | GPCR |
| CID000005379 | P    |
| CID000005386 | E    |
| CID000005391 | IC   |
| CID000005401 | GPCR |
| CID000005403 | GPCR |
| CID000005405 | GPCR |
| CID000005411 | IC   |
| CID000005419 | GPCR |
| CID000005452 | GPCR |
| CID000005457 | GPCR |
| CID000005467 | GPCR |
| CID000005468 | E    |
| CID000005472 | GPCR |
| CID000005473 | GPCR |
| CID000005474 | GPCR |
| CID000005476 | GPCR |
| CID000005482 | P    |

|              |      |
|--------------|------|
| CID000005487 | GPCR |
| CID000005503 | IC   |
| CID000005504 | GPCR |
| CID000005505 | IC   |
| CID000005506 | P    |
| CID000005507 | E    |
| CID000005508 | E    |
| CID000005510 | P    |
| CID000005517 | P    |
| CID000005524 | GPCR |
| CID000005526 | E    |
| CID000005531 | E    |
| CID000005546 | IC   |
| CID000005556 | IC   |
| CID000005560 | T    |
| CID000005566 | GPCR |
| CID000005567 | GPCR |
| CID000005568 | GPCR |
| CID000005572 | GPCR |
| CID000005573 | GPCR |
| CID000005574 | GPCR |
| CID000005578 | P    |

|              |      |
|--------------|------|
| CID000005582 | E    |
| CID000005584 | IC   |
| CID000005587 | GPCR |
| CID000005591 | NR   |
| CID000005593 | GPCR |
| CID000005596 | GPCR |
| CID000005606 | GPCR |
| CID000005625 | P    |
| CID000005639 | GPCR |
| CID000005648 | GPCR |
| CID000005656 | IC   |
| CID000005663 | E    |
| CID000005665 | E    |
| CID000005666 | IC   |
| CID000005707 | GPCR |
| CID000005709 | GPCR |
| CID000005717 | GPCR |
| CID000005720 | E    |
| CID000005724 | E    |
| CID000005732 | IC   |
| CID000005734 | IC   |
| CID000005735 | IC   |

|              |      |
|--------------|------|
| CID000005736 | GPCR |
| CID000005743 | NR   |
| CID000005744 | NR   |
| CID000005745 | NR   |
| CID000005754 | NR   |
| CID000005755 | NR   |
| CID000005756 | NR   |
| CID000005757 | NR   |
| CID000005768 | IC   |
| CID000005770 | T    |
| CID000005773 | P    |
| CID000005775 | GPCR |
| CID000005790 | E    |
| CID000005803 | NR   |
| CID000005815 | GPCR |
| CID000005819 | NR   |
| CID000005825 | IC   |
| CID000005832 | NR   |
| CID000005833 | NR   |
| CID000005834 | NR   |
| CID000005853 | E    |
| CID000005857 | NR   |

|              |      |
|--------------|------|
| CID000005858 | NR   |
| CID000005865 | NR   |
| CID000005870 | NR   |
| CID000005876 | NR   |
| CID000005877 | NR   |
| CID000005878 | NR   |
| CID000005881 | NR   |
| CID000005904 | P    |
| CID000005905 | P    |
| CID000005906 | GPCR |
| CID000005909 | GPCR |
| CID000005917 | IC   |
| CID000005920 | NR   |
| CID000005936 | E    |
| CID000005952 | NR   |
| CID000005959 | P    |
| CID000005965 | E    |
| CID000005983 | E    |
| CID000005991 | NR   |
| CID000005992 | E    |
| CID000005994 | NR   |
| CID000005995 | NR   |

|              |      |
|--------------|------|
| CID000006000 | IC   |
| CID000006005 | GPCR |
| CID000006010 | NR   |
| CID000006013 | NR   |
| CID000006018 | T    |
| CID000006024 | P    |
| CID000006032 | P    |
| CID000006041 | GPCR |
| CID000006047 | GPCR |
| CID000006081 | GPCR |
| CID000006087 | P    |
| CID000006098 | P    |
| CID000006166 | NR   |
| CID000006169 | GPCR |
| CID000006196 | P    |
| CID000006215 | NR   |
| CID000006216 | NR   |
| CID000006230 | NR   |
| CID000006234 | P    |
| CID000006238 | NR   |
| CID000006249 | P    |
| CID000006252 | E    |

|              |      |
|--------------|------|
| CID000006256 | P    |
| CID000006279 | NR   |
| CID000006292 | IC   |
| CID000006300 | NR   |
| CID000006307 | T    |
| CID000006436 | NR   |
| CID000006446 | NR   |
| CID000006468 | IC   |
| CID000006662 | P    |
| CID000006719 | E    |
| CID000006726 | GPCR |
| CID000006741 | NR   |
| CID000006832 | GPCR |
| CID000006834 | GPCR |
| CID000006869 | P    |
| CID000007028 | GPCR |
| CID000007172 | GPCR |
| CID000007534 | GPCR |
| CID000008223 | GPCR |
| CID000008225 | NR   |
| CID000008226 | GPCR |
| CID000008229 | GPCR |

|              |      |
|--------------|------|
| CID000008230 | GPCR |
| CID000008249 | PK   |
| CID000008271 | IC   |
| CID000008366 | E    |
| CID000008378 | P    |
| CID000008612 | IC   |
| CID000008982 | P    |
| CID000009051 | NR   |
| CID000009270 | NR   |
| CID000009294 | GPCR |
| CID000009324 | NR   |
| CID000009400 | NR   |
| CID000009403 | NR   |
| CID000009416 | NR   |
| CID000009417 | GPCR |
| CID000009429 | GPCR |
| CID000009444 | E    |
| CID000009564 | IC   |
| CID000009565 | IC   |
| CID000009642 | NR   |
| CID000009651 | E    |
| CID000009677 | NR   |

|              |      |
|--------------|------|
| CID000009681 | GPCR |
| CID000009782 | NR   |
| CID000009864 | E    |
| CID000009878 | NR   |
| CID000009880 | NR   |
| CID000009904 | NR   |
| CID000010101 | IC   |
| CID000010114 | E    |
| CID000010180 | E    |
| CID000010255 | IC   |
| CID000010517 | GPCR |
| CID000010531 | GPCR |
| CID000010547 | E    |
| CID000010631 | NR   |
| CID000010635 | NR   |
| CID000010660 | GPCR |
| CID000010836 | IC   |
| CID000011151 | E    |
| CID000011259 | IC   |
| CID000011290 | GPCR |
| CID000011683 | NR   |
| CID000012555 | E    |

|              |      |
|--------------|------|
| CID000012559 | P    |
| CID000012560 | P    |
| CID000013109 | NR   |
| CID000013308 | NR   |
| CID000013313 | NR   |
| CID000013314 | IC   |
| CID000013765 | NR   |
| CID000013769 | E    |
| CID000013789 | NR   |
| CID000013791 | NR   |
| CID000014051 | P    |
| CID000014687 | NR   |
| CID000014743 | NR   |
| CID000015020 | NR   |
| CID000015130 | GPCR |
| CID000015209 | NR   |
| CID000015541 | P    |
| CID000016078 | GPCR |
| CID000016106 | GPCR |
| CID000016229 | GPCR |
| CID000016230 | IC   |
| CID000016362 | GPCR |

|              |      |
|--------------|------|
| CID000016490 | NR   |
| CID000016533 | NR   |
| CID000016623 | NR   |
| CID000016752 | NR   |
| CID000016923 | NR   |
| CID000016960 | GPCR |
| CID000017134 | P    |
| CID000017925 | IC   |
| CID000018026 | GPCR |
| CID000018283 | P    |
| CID000018343 | E    |
| CID000018381 | P    |
| CID000019003 | P    |
| CID000019063 | E    |
| CID000019090 | NR   |
| CID000019135 | NR   |
| CID000019143 | GPCR |
| CID000019150 | P    |
| CID000019648 | P    |
| CID000019861 | GPCR |
| CID000020298 | GPCR |
| CID000020313 | IC   |

|              |      |
|--------------|------|
| CID000020469 | NR   |
| CID000020824 | P    |
| CID000021115 | NR   |
| CID000021138 | GPCR |
| CID000021319 | P    |
| CID000021453 | P    |
| CID000021653 | P    |
| CID000021700 | NR   |
| CID000021704 | P    |
| CID000021800 | NR   |
| CID000021826 | NR   |
| CID000021846 | GPCR |
| CID000021855 | GPCR |
| CID000022502 | P    |
| CID000023087 | P    |
| CID000023897 | GPCR |
| CID000024066 | P    |
| CID000024199 | GPCR |
| CID000024904 | IC   |
| CID000025050 | E    |
| CID000025096 | GPCR |
| CID000025103 | GPCR |

|              |      |
|--------------|------|
| CID000025249 | NR   |
| CID000025654 | GPCR |
| CID000026133 | NR   |
| CID000026388 | GPCR |
| CID000026533 | IC   |
| CID000026757 | E    |
| CID000027200 | P    |
| CID000027350 | IC   |
| CID000027400 | GPCR |
| CID000027447 | P    |
| CID000027881 | E    |
| CID000027991 | GPCR |
| CID000028417 | NR   |
| CID000028620 | E    |
| CID000028693 | GPCR |
| CID000028864 | GPCR |
| CID000029029 | P    |
| CID000029435 | E    |
| CID000030131 | GPCR |
| CID000030323 | E    |
| CID000030667 | GPCR |
| CID000030699 | P    |

|              |      |
|--------------|------|
| CID000030842 | GPCR |
| CID000031100 | GPCR |
| CID000031113 | E    |
| CID000031307 | NR   |
| CID000031378 | NR   |
| CID000031477 | GPCR |
| CID000031703 | E    |
| CID000031728 | GPCR |
| CID000032169 | IC   |
| CID000032778 | IC   |
| CID000032798 | NR   |
| CID000033036 | GPCR |
| CID000033039 | P    |
| CID000033255 | P    |
| CID000033477 | P    |
| CID000033613 | P    |
| CID000033624 | GPCR |
| CID000033625 | GPCR |
| CID000033630 | IC   |
| CID000033649 | IC   |
| CID000033672 | P    |
| CID000033741 | GPCR |

|              |      |
|--------------|------|
| CID000034040 | GPCR |
| CID000034041 | E    |
| CID000034312 | IC   |
| CID000034521 | E    |
| CID000034632 | IC   |
| CID000034768 | P    |
| CID000035329 | GPCR |
| CID000035370 | P    |
| CID000036119 | P    |
| CID000036143 | E    |
| CID000036273 | P    |
| CID000036283 | GPCR |
| CID000036294 | P    |
| CID000036462 | E    |
| CID000036523 | GPCR |
| CID000036709 | NR   |
| CID000036811 | GPCR |
| CID000036920 | GPCR |
| CID000036921 | P    |
| CID000036975 | GPCR |
| CID000037264 | GPCR |
| CID000037460 | GPCR |

|              |      |
|--------------|------|
| CID000037464 | GPCR |
| CID000037497 | IC   |
| CID000037542 | P    |
| CID000037768 | P    |
| CID000038077 | CA   |
| CID000038103 | P    |
| CID000038521 | GPCR |
| CID000038945 | IC   |
| CID000039031 | P    |
| CID000039042 | NR   |
| CID000039147 | GPCR |
| CID000039186 | IC   |
| CID000039468 | GPCR |
| CID000039764 | IC   |
| CID000039912 | E    |
| CID000039941 | E    |
| CID000040240 | P    |
| CID000040973 | NR   |
| CID000041049 | GPCR |
| CID000041376 | GPCR |
| CID000041386 | T    |
| CID000041693 | GPCR |

|              |      |
|--------------|------|
| CID000041774 | E    |
| CID000041781 | T    |
| CID000041835 | GPCR |
| CID000041867 | E    |
| CID000042008 | P    |
| CID000042368 | E    |
| CID000042396 | GPCR |
| CID000042890 | E    |
| CID000043157 | E    |
| CID000043507 | P    |
| CID000043593 | P    |
| CID000043672 | P    |
| CID000043708 | P    |
| CID000043815 | IC   |
| CID000044093 | E    |
| CID000044112 | GPCR |
| CID000044187 | P    |
| CID000044219 | E    |
| CID000044570 | E    |
| CID000044601 | GPCR |
| CID000047320 | IC   |
| CID000047471 | P    |

|              |      |
|--------------|------|
| CID000047499 | P    |
| CID000047528 | IC   |
| CID000047725 | GPCR |
| CID000047811 | GPCR |
| CID000047964 | P    |
| CID000048040 | IC   |
| CID000050138 | NR   |
| CID000050192 | IC   |
| CID000050224 | GPCR |
| CID000050287 | GPCR |
| CID000050515 | E    |
| CID000050599 | P    |
| CID000050893 | GPCR |
| CID000051038 | P    |
| CID000051044 | GPCR |
| CID000051081 | P    |
| CID000051173 | E    |
| CID000051263 | GPCR |
| CID000051550 | GPCR |
| CID000051565 | P    |
| CID000051634 | E    |
| CID000051710 | GPCR |

|              |      |
|--------------|------|
| CID000052542 | E    |
| CID000052919 | GPCR |
| CID000053000 | E    |
| CID000053024 | P    |
| CID000053232 | E    |
| CID000053275 | IC   |
| CID000053359 | E    |
| CID000053388 | GPCR |
| CID000053555 | E    |
| CID000053568 | E    |
| CID000053697 | GPCR |
| CID000053708 | E    |
| CID000054259 | P    |
| CID000054331 | P    |
| CID000054343 | GPCR |
| CID000054384 | GPCR |
| CID000054454 | E    |
| CID000054477 | GPCR |
| CID000054562 | GPCR |
| CID000054687 | E    |
| CID000054746 | GPCR |
| CID000054747 | E    |

|              |      |
|--------------|------|
| CID000054765 | GPCR |
| CID000054797 | E    |
| CID000054840 | IC   |
| CID000054889 | E    |
| CID000054891 | E    |
| CID000054897 | IC   |
| CID000054949 | E    |
| CID000055185 | P    |
| CID000055190 | GPCR |
| CID000055245 | NR   |
| CID000055256 | P    |
| CID000055283 | P    |
| CID000055390 | E    |
| CID000055472 | GPCR |
| CID000055480 | IC   |
| CID000055483 | GPCR |
| CID000055651 | GPCR |
| CID000055891 | E    |
| CID000055917 | E    |
| CID000056031 | GPCR |
| CID000056068 | NR   |
| CID000056207 | P    |

|              |      |
|--------------|------|
| CID000056237 | E    |
| CID000056329 | E    |
| CID000056338 | IC   |
| CID000056801 | GPCR |
| CID000056971 | GPCR |
| CID000057030 | E    |
| CID000057109 | GPCR |
| CID000057242 | GPCR |
| CID000057363 | E    |
| CID000057469 | CA   |
| CID000058504 | IC   |
| CID000058573 | E    |
| CID000059226 | GPCR |
| CID000059691 | GPCR |
| CID000059693 | E    |
| CID000059768 | GPCR |
| CID000059798 | IC   |
| CID000060020 | P    |
| CID000060062 | P    |
| CID000060149 | GPCR |
| CID000060164 | NR   |
| CID000060168 | IC   |

|              |      |
|--------------|------|
| CID000060172 | P    |
| CID000060198 | E    |
| CID000060464 | P    |
| CID000060490 | E    |
| CID000060496 | IC   |
| CID000060510 | IC   |
| CID000060539 | GPCR |
| CID000060558 | GPCR |
| CID000060561 | E    |
| CID000060594 | E    |
| CID000060606 | GPCR |
| CID000060648 | IC   |
| CID000060652 | E    |
| CID000060656 | GPCR |
| CID000060662 | IC   |
| CID000060691 | E    |
| CID000060692 | E    |
| CID000060697 | GPCR |
| CID000060699 | E    |
| CID000060713 | GPCR |
| CID000060734 | P    |
| CID000060737 | CA   |

|              |      |
|--------------|------|
| CID000060746 | P    |
| CID000060749 | E    |
| CID000060752 | IC   |
| CID000060769 | GPCR |
| CID000060774 | GPCR |
| CID000060781 | E    |
| CID000060786 | P    |
| CID000060788 | E    |
| CID000060789 | GPCR |
| CID000060795 | GPCR |
| CID000060809 | GPCR |
| CID000060814 | GPCR |
| CID000060816 | E    |
| CID000060819 | GPCR |
| CID000060822 | E    |
| CID000060824 | E    |
| CID000060825 | P    |
| CID000060834 | IC   |
| CID000060837 | E    |
| CID000060846 | GPCR |
| CID000060852 | E    |
| CID000060853 | GPCR |

|              |      |
|--------------|------|
| CID000060855 | P    |
| CID000060857 | GPCR |
| CID000060870 | NR   |
| CID000060871 | P    |
| CID000060876 | P    |
| CID000060877 | P    |
| CID000060910 | NR   |
| CID000060934 | P    |
| CID000060949 | GPCR |
| CID000060953 | E    |
| CID000060955 | E    |
| CID000062115 | P    |
| CID000062156 | GPCR |
| CID000062819 | GPCR |
| CID000062873 | GPCR |
| CID000062886 | IC   |
| CID000062956 | E    |
| CID000062959 | P    |
| CID000063009 | IC   |
| CID000063019 | NR   |
| CID000063043 | NR   |
| CID000063044 | NR   |

|              |      |
|--------------|------|
| CID000063046 | NR   |
| CID000063047 | NR   |
| CID000064139 | P    |
| CID000064142 | P    |
| CID000064147 | P    |
| CID000064627 | GPCR |
| CID000064642 | IC   |
| CID000064644 | IC   |
| CID000064706 | P    |
| CID000064710 | P    |
| CID000064718 | E    |
| CID000064725 | P    |
| CID000064782 | GPCR |
| CID000064922 | E    |
| CID000065013 | P    |
| CID000065014 | CR   |
| CID000065016 | P    |
| CID000065028 | P    |
| CID000065157 | NR   |
| CID000065435 | GPCR |
| CID000065449 | IC   |
| CID000065478 | NR   |

|              |      |
|--------------|------|
| CID000065498 | GPCR |
| CID000065501 | IC   |
| CID000065598 | E    |
| CID000065646 | P    |
| CID000065755 | P    |
| CID000065772 | GPCR |
| CID000065814 | GPCR |
| CID000065825 | IC   |
| CID000065856 | IC   |
| CID000065864 | P    |
| CID000065866 | IC   |
| CID000065881 | E    |
| CID000065914 | IC   |
| CID000065922 | GPCR |
| CID000065941 | IC   |
| CID000065948 | IC   |
| CID000065957 | P    |
| CID000065981 | IC   |
| CID000065998 | IC   |
| CID000065999 | GPCR |
| CID000066249 | NR   |
| CID000066264 | GPCR |

|              |      |
|--------------|------|
| CID000066440 | NR   |
| CID000068555 | GPCR |
| CID000068582 | NR   |
| CID000068601 | GPCR |
| CID000068613 | GPCR |
| CID000068634 | GPCR |
| CID000068682 | P    |
| CID000068712 | GPCR |
| CID000068736 | IC   |
| CID000068740 | E    |
| CID000068741 | E    |
| CID000068770 | GPCR |
| CID000068783 | NR   |
| CID000068802 | E    |
| CID000068844 | E    |
| CID000068861 | NR   |
| CID000068873 | NR   |
| CID000068942 | E    |
| CID000070881 | E    |
| CID000071141 | P    |
| CID000071231 | IC   |
| CID000071301 | GPCR |

|              |      |
|--------------|------|
| CID000071307 | E    |
| CID000071310 | GPCR |
| CID000071320 | E    |
| CID000071329 | IC   |
| CID000071339 | P    |
| CID000071348 | GPCR |
| CID000071355 | E    |
| CID000071360 | GPCR |
| CID000071371 | NR   |
| CID000071392 | P    |
| CID000071414 | NR   |
| CID000071446 | P    |
| CID000071469 | P    |
| CID000071534 | GPCR |
| CID000071616 | P    |
| CID000071640 | GPCR |
| CID000071698 | GPCR |
| CID000071734 | E    |
| CID000071739 | GPCR |
| CID000071763 | GPCR |
| CID000071809 | GPCR |
| CID000071906 | NR   |

|              |      |
|--------------|------|
| CID000071926 | E    |
| CID000071955 | GPCR |
| CID000071961 | P    |
| CID000071986 | GPCR |
| CID000071992 | E    |
| CID000072004 | E    |
| CID000072006 | GPCR |
| CID000072014 | GPCR |
| CID000072015 | P    |
| CID000072036 | GPCR |
| CID000072059 | E    |
| CID000072171 | E    |
| CID000072231 | CA   |
| CID000072286 | GPCR |
| CID000072396 | P    |
| CID000072474 | P    |
| CID000072492 | P    |
| CID000072981 | P    |
| CID000073011 | P    |
| CID000073115 | P    |
| CID000073303 | P    |
| CID000073491 | P    |

|              |      |
|--------------|------|
| CID000077990 | E    |
| CID000077992 | GPCR |
| CID000077993 | GPCR |
| CID000077997 | GPCR |
| CID000077998 | NR   |
| CID000082146 | NR   |
| CID000082148 | GPCR |
| CID000082153 | NR   |
| CID000083786 | E    |
| CID000083898 | GPCR |
| CID000084003 | E    |
| CID000084019 | GPCR |
| CID000084029 | P    |
| CID000091276 | GPCR |
| CID000091438 | NR   |
| CID000091499 | GPCR |
| CID000091562 | P    |
| CID000091610 | IC   |
| CID000091668 | NR   |
| CID000092253 | IC   |
| CID000092727 | P    |
| CID000093184 | P    |

|              |      |
|--------------|------|
| CID000093504 | IC   |
| CID000102146 | NR   |
| CID000102232 | NR   |
| CID000104741 | NR   |
| CID000104758 | E    |
| CID000104762 | E    |
| CID000104838 | P    |
| CID000104849 | GPCR |
| CID000104865 | GPCR |
| CID000107688 | E    |
| CID000107706 | E    |
| CID000107807 | E    |
| CID000107930 | GPCR |
| CID000107969 | GPCR |
| CID000107994 | E    |
| CID000107999 | GPCR |
| CID000108182 | GPCR |
| CID000110634 | E    |
| CID000110635 | E    |
| CID000114897 | E    |
| CID000114905 | GPCR |
| CID000115162 | P    |

|              |      |
|--------------|------|
| CID000115355 | E    |
| CID000115367 | GPCR |
| CID000119031 | E    |
| CID000119170 | IC   |
| CID000119182 | E    |
| CID000119259 | IC   |
| CID000119369 | GPCR |
| CID000119569 | GPCR |
| CID000119583 | GPCR |
| CID000119607 | E    |
| CID000119828 | E    |
| CID000121888 | GPCR |
| CID000121891 | IC   |
| CID000121892 | IC   |
| CID000121903 | GPCR |
| CID000123600 | GPCR |
| CID000123606 | GPCR |
| CID000123607 | GPCR |
| CID000123619 | E    |
| CID000123630 | P    |
| CID000123631 | CR   |
| CID000123879 | GPCR |

|              |      |
|--------------|------|
| CID000124087 | GPCR |
| CID000124088 | P    |
| CID000124093 | P    |
| CID000125017 | IC   |
| CID000125564 | GPCR |
| CID000125846 | P    |
| CID000126941 | E    |
| CID000127527 | P    |
| CID000129211 | GPCR |
| CID000129319 | GPCR |
| CID000130313 | P    |
| CID000130564 | E    |
| CID000130881 | GPCR |
| CID000130918 | GPCR |
| CID000130956 | E    |
| CID000131535 | P    |
| CID000131601 | E    |
| CID000131682 | E    |
| CID000132519 | E    |
| CID000132706 | GPCR |
| CID000132790 | GPCR |
| CID000132916 | GPCR |

|              |      |
|--------------|------|
| CID000133016 | GPCR |
| CID000133078 | GPCR |
| CID000133081 | GPCR |
| CID000133371 | GPCR |
| CID000133621 | GPCR |
| CID000134018 | E    |
| CID000146294 | GPCR |
| CID000146570 | IC   |
| CID000148192 | P    |
| CID000148195 | E    |
| CID000148200 | IC   |
| CID000148202 | E    |
| CID000149096 | P    |
| CID000150171 | GPCR |
| CID000150311 | T    |
| CID000150610 | P    |
| CID000151166 | E    |
| CID000151170 | E    |
| CID000151171 | GPCR |
| CID000151172 | T    |
| CID000151193 | CR   |
| CID000153241 | E    |

|              |      |
|--------------|------|
| CID000153270 | E    |
| CID000153751 | E    |
| CID000153941 | P    |
| CID000153994 | IC   |
| CID000153997 | E    |
| CID000154256 | NR   |
| CID000154413 | NR   |
| CID000154417 | GPCR |
| CID000154575 | E    |
| CID000155435 | NR   |
| CID000155773 | GPCR |
| CID000155815 | E    |
| CID000156321 | GPCR |
| CID000156328 | IC   |
| CID000156333 | GPCR |
| CID000156345 | P    |
| CID000156391 | E    |
| CID000156413 | CR   |
| CID000156418 | GPCR |
| CID000156422 | PK   |
| CID000156689 | GPCR |
| CID000157049 | E    |

|              |      |
|--------------|------|
| CID000157838 | E    |
| CID000157918 | GPCR |
| CID000158781 | GPCR |
| CID000158783 | GPCR |
| CID000158793 | GPCR |
| CID000158795 | GPCR |
| CID000159269 | P    |
| CID000159271 | E    |
| CID000159324 | E    |
| CID000159594 | GPCR |
| CID000160024 | E    |
| CID000162302 | GPCR |
| CID000162581 | NR   |
| CID000162834 | GPCR |
| CID000162862 | P    |
| CID000163296 | P    |
| CID000163838 | IC   |
| CID000164509 | IC   |
| CID000164521 | GPCR |
| CID000164739 | GPCR |
| CID000165579 | P    |
| CID000166543 | GPCR |

|              |      |
|--------------|------|
| CID000166553 | E    |
| CID000166558 | E    |
| CID000166562 | E    |
| CID000167441 | P    |
| CID000169075 | P    |
| CID000169870 | NR   |
| CID000170361 | IC   |
| CID000171758 | P    |
| CID000171808 | P    |
| CID000171883 | P    |
| CID000172306 | GPCR |
| CID000172997 | GPCR |
| CID000174174 | GPCR |
| CID000175540 | GPCR |
| CID000175804 | IC   |
| CID000176166 | PK   |
| CID000177335 | GPCR |
| CID000178029 | GPCR |
| CID000178052 | IC   |
| CID000178265 | P    |
| CID000179337 | NR   |
| CID000179344 | IC   |

|              |      |
|--------------|------|
| CID000180081 | IC   |
| CID000181625 | NR   |
| CID000183797 | E    |
| CID000183811 | GPCR |
| CID000189729 | E    |
| CID000189821 | NR   |
| CID000190816 | E    |
| CID000193962 | P    |
| CID000198125 | E    |
| CID000202225 | P    |
| CID000204101 | E    |
| CID000204105 | IC   |
| CID000204106 | E    |
| CID000204109 | NR   |
| CID000206044 | NR   |
| CID000208898 | IC   |
| CID000208902 | GPCR |
| CID000208907 | E    |
| CID000208908 | CR   |
| CID000208910 | E    |
| CID000208928 | GPCR |
| CID000208951 | GPCR |

|              |      |
|--------------|------|
| CID000213039 | P    |
| CID000213043 | P    |
| CID000213046 | GPCR |
| CID000214356 | P    |
| CID000216210 | E    |
| CID000216235 | GPCR |
| CID000216416 | NR   |
| CID000216456 | IC   |
| CID000216466 | GPCR |
| CID000219024 | GPCR |
| CID000219100 | E    |
| CID000219101 | IC   |
| CID000222757 | NR   |
| CID000222786 | NR   |
| CID000225609 | NR   |
| CID000229021 | NR   |
| CID000229295 | NR   |
| CID000229455 | NR   |
| CID000235905 | NR   |
| CID000240767 | NR   |
| CID000247839 | NR   |
| CID000251636 | NR   |

|              |      |
|--------------|------|
| CID000252372 | NR   |
| CID000294641 | E    |
| CID000337359 | E    |
| CID000383413 | GPCR |
| CID000387447 | E    |
| CID000392622 | P    |
| CID000439260 | GPCR |
| CID000439285 | GPCR |
| CID000439299 | E    |
| CID000439302 | GPCR |
| CID000439501 | E    |
| CID000439693 | E    |
| CID000440707 | NR   |
| CID000441129 | P    |
| CID000441199 | P    |
| CID000441207 | E    |
| CID000441233 | E    |
| CID000441277 | GPCR |
| CID000441290 | IC   |
| CID000441300 | P    |
| CID000441313 | E    |
| CID000441314 | E    |

|              |      |
|--------------|------|
| CID000441335 | NR   |
| CID000441336 | NR   |
| CID000441341 | T    |
| CID000441350 | E    |
| CID000441371 | P    |
| CID000441383 | P    |
| CID000441397 | P    |
| CID000441401 | P    |
| CID000441404 | NR   |
| CID000441406 | NR   |
| CID000443371 | GPCR |
| CID000443372 | GPCR |
| CID000443375 | GPCR |
| CID000443376 | E    |
| CID000443380 | E    |
| CID000443382 | P    |
| CID000443387 | P    |
| CID000443408 | GPCR |
| CID000443868 | IC   |
| CID000443872 | NR   |
| CID000443873 | E    |
| CID000443884 | GPCR |

|              |      |
|--------------|------|
| CID000443889 | GPCR |
| CID000443894 | GPCR |
| CID000443935 | NR   |
| CID000443947 | NR   |
| CID000443951 | GPCR |
| CID000443953 | P    |
| CID000443958 | NR   |
| CID000443980 | NR   |
| CID000444008 | NR   |
| CID000444020 | E    |
| CID000444021 | P    |
| CID000444025 | NR   |
| CID000444028 | E    |
| CID000444030 | GPCR |
| CID000444036 | NR   |
| CID000444499 | E    |
| CID000445643 | E    |
| CID000446156 | E    |
| CID000446157 | E    |
| CID000446541 | E    |
| CID000446556 | E    |
| CID000446596 | P    |

|              |      |
|--------------|------|
| CID000446727 | P    |
| CID000447715 | NR   |
| CID000448537 | NR   |
| CID000449171 | NR   |
| CID000449193 | E    |
| CID000449459 | NR   |
| CID000451447 | P    |
| CID000451668 | E    |
| CID000452191 | E    |
| CID000456255 | P    |
| CID000464205 | P    |
| CID000466151 | E    |
| CID000467825 | P    |
| CID000477468 | P    |
| CID000604519 | E    |
| CID000636374 | NR   |
| CID000636380 | E    |
| CID000636402 | E    |
| CID000636405 | P    |
| CID000636411 | E    |
| CID000638678 | GPCR |
| CID000644025 | IC   |

|              |      |
|--------------|------|
| CID000644073 | GPCR |
| CID000656511 | P    |
| CID000656575 | P    |
| CID000656580 | P    |
| CID000656583 | E    |
| CID000656615 | NR   |
| CID000656664 | GPCR |
| CID000656667 | IC   |
| CID000656804 | NR   |
| CID000657201 | GPCR |
| CID000657298 | E    |
| CID000657308 | GPCR |
| CID000667476 | NR   |
| CID000667493 | E    |
| CID000667550 | E    |
| CID000688272 | GPCR |
| CID000941361 | IC   |
| CID000941651 | GPCR |
| CID000969472 | IC   |
| CID001349907 | E    |
| CID001547484 | GPCR |
| CID001548886 | E    |

|              |      |
|--------------|------|
| CID001548943 | IC   |
| CID001548952 | NR   |
| CID001548954 | NR   |
| CID001548971 | E    |
| CID001548992 | GPCR |
| CID001548999 | GPCR |
| CID001549007 | P    |
| CID001549119 | E    |
| CID002724385 | E    |
| CID002733509 | E    |
| CID002733525 | NR   |
| CID002826718 | P    |
| CID003000226 | P    |
| CID003000715 | IC   |
| CID003001028 | NR   |
| CID003001055 | GPCR |
| CID003001322 | CR   |
| CID003002820 | P    |
| CID003005572 | NR   |
| CID003009355 | CR   |
| CID003032285 | IC   |
| CID003032325 | NR   |

|              |      |
|--------------|------|
| CID003033151 | GPCR |
| CID003033538 | GPCR |
| CID003033637 | GPCR |
| CID003033676 | GPCR |
| CID003033702 | E    |
| CID003033766 | NR   |
| CID003033825 | E    |
| CID003033860 | IC   |
| CID003033887 | GPCR |
| CID003033968 | NR   |
| CID003033988 | P    |
| CID003034010 | E    |
| CID003034011 | NR   |
| CID003035240 | GPCR |
| CID003036505 | NR   |
| CID003037705 | NR   |
| CID003038497 | IC   |
| CID003038522 | CR   |
| CID003042089 | GPCR |
| CID003052762 | GPCR |
| CID003052775 | E    |
| CID003055168 | NR   |

|              |      |
|--------------|------|
| CID003058754 | E    |
| CID003081361 | CR   |
| CID003081912 | GPCR |
| CID003082555 | GPCR |
| CID003083544 | GPCR |
| CID003086400 | GPCR |
| CID003086651 | E    |
| CID003086671 | E    |
| CID004369359 | E    |
| CID004375468 | GPCR |
| CID004659569 | E    |
| CID005001396 | E    |
| CID005280360 | GPCR |
| CID005280363 | GPCR |
| CID005280427 | GPCR |
| CID005280453 | NR   |
| CID005280723 | GPCR |
| CID005280754 | E    |
| CID005280793 | NR   |
| CID005280795 | NR   |
| CID005280980 | P    |
| CID005281004 | NR   |

|              |      |
|--------------|------|
| CID005281006 | P    |
| CID005281034 | NR   |
| CID005281037 | GPCR |
| CID005281040 | GPCR |
| CID005281042 | IC   |
| CID005281074 | GPCR |
| CID005281075 | GPCR |
| CID005281078 | E    |
| CID005281081 | E    |
| CID005281107 | GPCR |
| CID005281881 | GPCR |
| CID005282136 | GPCR |
| CID005282138 | IC   |
| CID005282165 | P    |
| CID005282175 | GPCR |
| CID005282181 | NR   |
| CID005282183 | E    |
| CID005282188 | P    |
| CID005282190 | NR   |
| CID005282192 | P    |
| CID005282205 | GPCR |
| CID005282211 | P    |

|              |      |
|--------------|------|
| CID005282226 | GPCR |
| CID005282229 | NR   |
| CID005282234 | GPCR |
| CID005282241 | P    |
| CID005282375 | NR   |
| CID005282381 | GPCR |
| CID005282415 | GPCR |
| CID005282425 | IC   |
| CID005282432 | P    |
| CID005282437 | P    |
| CID005282439 | E    |
| CID005282442 | GPCR |
| CID005282449 | GPCR |
| CID005282451 | E    |
| CID005282592 | GPCR |
| CID005282593 | GPCR |
| CID005284371 | GPCR |
| CID005284402 | E    |
| CID005284514 | GPCR |
| CID005284527 | P    |
| CID005284533 | NR   |
| CID005284537 | NR   |

|              |      |
|--------------|------|
| CID005284543 | GPCR |
| CID005284549 | E    |
| CID005284554 | P    |
| CID005284555 | NR   |
| CID005284566 | GPCR |
| CID005284569 | GPCR |
| CID005284570 | GPCR |
| CID005284592 | GPCR |
| CID005284594 | GPCR |
| CID005284595 | GPCR |
| CID005284596 | GPCR |
| CID005284599 | GPCR |
| CID005284603 | GPCR |
| CID005284604 | GPCR |
| CID005284612 | NR   |
| CID005284627 | IC   |
| CID005287541 | E    |
| CID005287969 | E    |
| CID005288320 | E    |
| CID005288826 | GPCR |
| CID005289223 | GPCR |
| CID005311027 | GPCR |

|              |      |
|--------------|------|
| CID005311035 | GPCR |
| CID005311037 | GPCR |
| CID005311051 | NR   |
| CID005311064 | GPCR |
| CID005311066 | NR   |
| CID005311067 | NR   |
| CID005311068 | GPCR |
| CID005311101 | NR   |
| CID005311181 | GPCR |
| CID005311217 | IC   |
| CID005311221 | GPCR |
| CID005311225 | GPCR |
| CID005311236 | GPCR |
| CID005311304 | GPCR |
| CID005311309 | IC   |
| CID005311398 | IC   |
| CID005311412 | NR   |
| CID005311413 | GPCR |
| CID005311424 | GPCR |
| CID005311447 | E    |
| CID005311505 | NR   |
| CID005311507 | GPCR |

|              |      |
|--------------|------|
| CID005312125 | GPCR |
| CID005312153 | GPCR |
| CID005324345 | IC   |
| CID005328940 | PK   |
| CID005329098 | CR   |
| CID005352062 | E    |
| CID005353853 | P    |
| CID005353894 | E    |
| CID005359271 | GPCR |
| CID005359272 | GPCR |
| CID005359371 | GPCR |
| CID005359476 | E    |
| CID005360515 | GPCR |
| CID005360696 | IC   |
| CID005360697 | IC   |
| CID005361092 | GPCR |
| CID005361880 | GPCR |
| CID005361917 | GPCR |
| CID005362065 | P    |
| CID005362114 | P    |
| CID005362115 | E    |
| CID005362118 | E    |

|              |      |
|--------------|------|
| CID005362123 | E    |
| CID005362129 | E    |
| CID005362417 | E    |
| CID005362422 | E    |
| CID005362436 | GPCR |
| CID005362440 | P    |
| CID005381226 | P    |
| CID005388961 | E    |
| CID005462328 | GPCR |
| CID005462501 | E    |
| CID005463984 | E    |
| CID005464105 | E    |
| CID005464201 | E    |
| CID005464343 | E    |
| CID005464355 | P    |
| CID005475158 | GPCR |
| CID005479529 | P    |
| CID005479530 | P    |
| CID005479537 | P    |
| CID005479539 | P    |
| CID005480431 | P    |
| CID005481173 | P    |

|              |      |
|--------------|------|
| CID005481350 | P    |
| CID005484727 | E    |
| CID005486182 | P    |
| CID005486198 | IC   |
| CID005486684 | GPCR |
| CID005486971 | IC   |
| CID005487888 | P    |
| CID005488547 | GPCR |
| CID005489436 | GPCR |
| CID005490674 | E    |
| CID005491954 | P    |
| CID005493444 | E    |
| CID005497196 | PK   |
| CID005702062 | GPCR |
| CID005702160 | GPCR |
| CID005742673 | P    |
| CID005742832 | P    |
| CID005743186 | P    |
| CID006321416 | P    |
| CID006323490 | P    |
| CID006323497 | P    |
| CID006324663 | GPCR |

|              |      |
|--------------|------|
| CID006328657 | P    |
| CID006335986 | P    |
| CID006336505 | P    |
| CID006337614 | GPCR |
| CID006347538 | E    |
| CID006400678 | P    |
| CID006410758 | P    |
| CID006433090 | GPCR |
| CID006433095 | GPCR |
| CID006433110 | T    |
| CID006433122 | GPCR |
| CID006435415 | E    |
| CID006436055 | P    |
| CID006436090 | E    |
| CID006436123 | GPCR |
| CID006436135 | GPCR |
| CID006436168 | P    |
| CID006436640 | GPCR |
| CID006437850 | E    |
| CID006437877 | P    |
| CID006438339 | GPCR |
| CID006438378 | GPCR |

|              |      |
|--------------|------|
| CID006439420 | E    |
| CID006444692 | CR   |
| CID006445230 | GPCR |
| CID006445562 | CR   |
| CID006450173 | CA   |
| CID006450333 | GPCR |
| CID006450546 | IC   |
| CID006450800 | E    |
| CID006450815 | GPCR |
| CID006450822 | GPCR |
| CID006451325 | E    |
| CID006456014 | E    |
| CID006506050 | GPCR |
| CID006509849 | GPCR |
| CID006509979 | E    |
| CID006526396 | P    |
| CID006533629 | P    |
| CID006537431 | P    |
| CID006540466 | P    |
| CID006540478 | NR   |
| CID006604100 | IC   |
| CID006708482 | E    |

|              |      |
|--------------|------|
| CID006713928 | P    |
| CID006714002 | NR   |
| CID006914163 | T    |
| CID006915944 | P    |
| CID006917715 | NR   |
| CID006917778 | IC   |
| CID006917815 | E    |
| CID006917951 | GPCR |
| CID006917956 | E    |
| CID006918029 | GPCR |
| CID006918091 | E    |
| CID006918106 | GPCR |
| CID006918107 | GPCR |
| CID006918130 | E    |
| CID006918140 | GPCR |
| CID006918141 | NR   |
| CID006918155 | NR   |
| CID006918191 | E    |
| CID006918218 | P    |
| CID006918236 | IC   |
| CID006918248 | GPCR |
| CID006918266 | GPCR |

|              |      |
|--------------|------|
| CID006918278 | E    |
| CID006918296 | E    |
| CID006918305 | IC   |
| CID006918330 | GPCR |
| CID006918336 | E    |
| CID006918365 | GPCR |
| CID006918366 | GPCR |
| CID006918387 | GPCR |
| CID006918456 | GPCR |
| CID006918486 | E    |
| CID006918493 | GPCR |
| CID006918523 | E    |
| CID006918524 | GPCR |
| CID006918548 | NR   |
| CID006918554 | GPCR |
| CID006918558 | GPCR |
| CID006918580 | GPCR |
| CID006918602 | E    |
| CID006918638 | E    |
| CID006918837 | E    |
| CID009568614 | E    |
| CID009570757 | P    |

|              |      |
|--------------|------|
| CID009571001 | GPCR |
| CID009571003 | IC   |
| CID009571107 | P    |
| CID009574101 | E    |
| CID009577221 | NR   |
| CID009578005 | E    |
| CID009578243 | E    |
| CID009578572 | E    |
| CID009795739 | GPCR |
| CID009796068 | E    |
| CID009796181 | E    |
| CID009796590 | E    |
| CID009804204 | GPCR |
| CID009805430 | GPCR |
| CID009818306 | NR   |
| CID009820073 | E    |
| CID009821849 | E    |
| CID009821951 | GPCR |
| CID009823820 | CR   |
| CID009824145 | IC   |
| CID009824350 | E    |
| CID009825285 | GPCR |

|              |      |
|--------------|------|
| CID009826744 | GPCR |
| CID009828911 | GPCR |
| CID009830519 | P    |
| CID009832383 | GPCR |
| CID009837243 | T    |
| CID009838021 | GPCR |
| CID009838712 | CR   |
| CID009838762 | GPCR |
| CID009843089 | E    |
| CID009844194 | GPCR |
| CID009851821 | E    |
| CID009854011 | GPCR |
| CID009854489 | NR   |
| CID009857255 | GPCR |
| CID009859832 | E    |
| CID009862248 | NR   |
| CID009865515 | E    |
| CID009865528 | GPCR |
| CID009865554 | CR   |
| CID009867642 | GPCR |
| CID009868491 | GPCR |
| CID009869929 | E    |

|              |      |
|--------------|------|
| CID009871074 | PK   |
| CID009871419 | GPCR |
| CID009871420 | T    |
| CID009875401 | E    |
| CID009881504 | IC   |
| CID009883933 | IC   |
| CID009884366 | GPCR |
| CID009886917 | E    |
| CID009887712 | T    |
| CID009887754 | E    |
| CID009887812 | GPCR |
| CID009888484 | NR   |
| CID009892480 | GPCR |
| CID009892860 | E    |
| CID009910098 | GPCR |
| CID009911830 | CR   |
| CID009912771 | E    |
| CID009913767 | GPCR |
| CID009913881 | E    |
| CID009915743 | CR   |
| CID009918079 | GPCR |
| CID009924495 | IC   |

|              |      |
|--------------|------|
| CID009926791 | PK   |
| CID009931953 | E    |
| CID009933475 | CR   |
| CID009939609 | E    |
| CID009949848 | NR   |
| CID009952884 | E    |
| CID009954033 | NR   |
| CID009961434 | E    |
| CID009966051 | GPCR |
| CID009977819 | CR   |
| CID009980241 | NR   |
| CID009997821 | P    |
| CID010041070 | NR   |
| CID010052040 | GPCR |
| CID010071196 | GPCR |
| CID010077129 | GPCR |
| CID010095005 | NR   |
| CID010096344 | E    |
| CID010102486 | IC   |
| CID010113978 | CR   |
| CID010116877 | GPCR |
| CID010117987 | GPCR |

|              |      |
|--------------|------|
| CID010127622 | PK   |
| CID010152654 | E    |
| CID010182969 | E    |
| CID010184653 | CR   |
| CID010184665 | GPCR |
| CID010216431 | E    |
| CID010220503 | GPCR |
| CID010250769 | P    |
| CID010274777 | NR   |
| CID010275777 | E    |
| CID010280735 | E    |
| CID010286159 | NR   |
| CID010295295 | NR   |
| CID010296883 | PK   |
| CID010302451 | PK   |
| CID010343641 | GPCR |
| CID010345213 | GPCR |
| CID010360683 | NR   |
| CID010366136 | CR   |
| CID010440987 | GPCR |
| CID010453870 | T    |
| CID010459564 | GPCR |

|              |      |
|--------------|------|
| CID010461508 | PK   |
| CID011154555 | GPCR |
| CID011154925 | CR   |
| CID011167602 | CR   |
| CID011188409 | E    |
| CID011204019 | P    |
| CID011223423 | GPCR |
| CID011226090 | GPCR |
| CID011234052 | CR   |
| CID011238823 | GPCR |
| CID011243969 | E    |
| CID011250647 | GPCR |
| CID011253490 | E    |
| CID011281011 | GPCR |
| CID011285791 | CR   |
| CID011319053 | GPCR |
| CID011340891 | GPCR |
| CID011347535 | E    |
| CID011395145 | NR   |
| CID011411233 | P    |
| CID011417567 | E    |
| CID011430856 | GPCR |

|              |      |
|--------------|------|
| CID011452716 | CA   |
| CID011467166 | GPCR |
| CID011494412 | PK   |
| CID011504294 | GPCR |
| CID011516136 | E    |
| CID011519069 | GPCR |
| CID011526696 | GPCR |
| CID011552706 | PK   |
| CID011556711 | E    |
| CID011561674 | E    |
| CID011597537 | PK   |
| CID011597697 | IC   |
| CID011604525 | GPCR |
| CID011626560 | CR   |
| CID011634458 | E    |
| CID011634973 | GPCR |
| CID011640390 | CR   |
| CID011641515 | E    |
| CID011658655 | IC   |
| CID011658859 | GPCR |
| CID011667893 | CR   |
| CID011671467 | PK   |

|              |      |
|--------------|------|
| CID011683556 | GPCR |
| CID011707110 | PK   |
| CID011749858 | E    |
| CID011876263 | NR   |
| CID011949652 | E    |
| CID011954223 | GPCR |
| CID011954290 | IC   |
| CID011954310 | NR   |
| CID011960529 | E    |
| CID011979316 | GPCR |
| CID011988953 | T    |
| CID012358971 | IC   |
| CID015052414 | NR   |
| CID015547703 | E    |
| CID015940185 | P    |
| CID015942715 | NR   |
| CID015983988 | E    |
| CID016004692 | GPCR |
| CID016058810 | T    |
| CID016066663 | GPCR |
| CID016070111 | CA   |
| CID016071605 | GPCR |

|              |      |
|--------------|------|
| CID016088021 | E    |
| CID016129616 | GPCR |
| CID016129617 | GPCR |
| CID016129620 | GPCR |
| CID016129672 | CR   |
| CID016129681 | GPCR |
| CID016129682 | GPCR |
| CID016129690 | IC   |
| CID016129703 | E    |
| CID016129704 | E    |
| CID016130938 | GPCR |
| CID016130957 | GPCR |
| CID016131215 | GPCR |
| CID016132283 | GPCR |
| CID016132357 | GPCR |
| CID016132392 | GPCR |
| CID016132418 | CR   |
| CID016132438 | CR   |
| CID016132441 | E    |
| CID016136245 | GPCR |
| CID016157882 | GPCR |
| CID016197723 | CA   |

|              |      |
|--------------|------|
| CID016220188 | PK   |
| CID016394563 | E    |
| CID016678941 | T    |
| CID016683012 | E    |
| CID016683028 | NR   |
| CID020055008 | NR   |
| CID020629114 | GPCR |
| CID021309251 | P    |
| CID021874557 | GPCR |
| CID023083982 | P    |
| CID023652731 | E    |
| CID023653789 | GPCR |
| CID023668479 | P    |
| CID023690938 | E    |
| CID023724523 | P    |
| CID023724530 | PK   |
| CID023724531 | PK   |
| CID023724781 | GPCR |
| CID023724842 | P    |
| CID023724872 | P    |
| CID023724885 | P    |
| CID023724902 | GPCR |

|              |      |
|--------------|------|
| CID023725064 | GPCR |
| CID023725083 | P    |
| CID023725088 | GPCR |
| CID023725625 | E    |
| CID023727689 | GPCR |
| CID024771867 | PK   |
| CID024775005 | GPCR |
| CID024776445 | GPCR |
| CID024795088 | NR   |
| CID024812758 | T    |
| CID024826799 | PK   |
| CID024838347 | GPCR |
| CID024847745 | P    |
| CID024889392 | CR   |
| CID025070031 | GPCR |
| CID025074469 | GPCR |
| CID025074886 | GPCR |
| CID025077649 | GPCR |
| CID025102847 | CR   |
| CID025126797 | PK   |
| CID025183872 | E    |
| CID025195354 | GPCR |

|              |      |
|--------------|------|
| CID025201794 | E    |
| CID026275995 | P    |
| CID027885548 | P    |
| CID042611257 | PK   |
| CID044146714 | CR   |
| CID044201125 | E    |
| CID044462760 | PK   |
| CID044513473 | E    |
| CID046908928 | T    |
| CID046926350 | PK   |
| CID049787020 | P    |
| CID051508717 | E    |
| CID051529148 | E    |
| CID051537605 | P    |
| CID051600099 | P    |
| CID051601240 | P    |
| CID051655231 | P    |
| CID053297329 | P    |
| CID053297362 | GPCR |
| CID053325981 | E    |
| CID053487898 | E    |
| CID054671203 | P    |

|              |    |
|--------------|----|
| CID054675768 | P  |
| CID054675779 | P  |
| CID054675785 | P  |
| CID054676537 | E  |
| CID054680692 | E  |
| CID054684141 | E  |
| CID054685524 | E  |
| CID054686183 | P  |
| CID054686350 | E  |
| CID054686904 | P  |
| CID054690031 | E  |
| CID054698175 | E  |
| CID054708299 | E  |
| CID056603661 | P  |
| CID056841789 | CA |
