# Supplementary material for: Gene Ontology and KEGG Pathway Enrichment Analysis of a Drug Target-Based Classification System
Source: PubMed Central journal article supplement (PMC4423955; doi:10.1371/journal.pone.0126492), 2015-05-07
Supplement: pone.0126492.s002.pdf [file pone.0126492.s002.pdf]

**S2 Table.** The MaxRel feature list for the features about KEGG pathways.

| <b>Rank</b> | <b>Feature name</b> | <b>Score</b> |
|-------------|---------------------|--------------|
| 1           | hsa04970            | 0.084        |
| 2           | hsa04080            | 0.075        |
| 3           | hsa04540            | 0.071        |
| 4           | hsa04020            | 0.071        |
| 5           | hsa05033            | 0.065        |
| 6           | hsa04727            | 0.064        |
| 7           | hsa04723            | 0.062        |
| 8           | hsa05206            | 0.061        |
| 9           | hsa04510            | 0.06         |
| 10          | hsa04726            | 0.06         |
| 11          | hsa04012            | 0.06         |
| 12          | hsa04144            | 0.059        |
| 13          | hsa04520            | 0.058        |
| 14          | hsa04015            | 0.057        |
| 15          | hsa04014            | 0.055        |
| 16          | hsa04151            | 0.054        |
| 17          | hsa05223            | 0.054        |
| 18          | hsa05218            | 0.053        |
| 19          | hsa05205            | 0.051        |
| 20          | hsa04261            | 0.049        |

|    |          |       |
|----|----------|-------|
| 21 | hsa05160 | 0.048 |
| 22 | hsa05200 | 0.048 |
| 23 | hsa05215 | 0.047 |
| 24 | hsa05219 | 0.046 |
| 25 | hsa05221 | 0.046 |
| 26 | hsa04062 | 0.045 |
| 27 | hsa04010 | 0.045 |
| 28 | hsa04370 | 0.044 |
| 29 | hsa04728 | 0.044 |
| 30 | hsa04722 | 0.043 |
| 31 | hsa05213 | 0.043 |
| 32 | hsa04917 | 0.043 |
| 33 | hsa04725 | 0.042 |
| 34 | hsa05220 | 0.041 |
| 35 | hsa05212 | 0.041 |
| 36 | hsa04960 | 0.04  |
| 37 | hsa04060 | 0.04  |
| 38 | hsa04810 | 0.04  |
| 39 | hsa04068 | 0.039 |
| 40 | hsa05214 | 0.039 |
| 41 | hsa05340 | 0.039 |
| 42 | hsa04961 | 0.038 |

|    |          |       |
|----|----------|-------|
| 43 | hsa04650 | 0.038 |
| 44 | hsa04911 | 0.038 |
| 45 | hsa05162 | 0.038 |
| 46 | hsa05202 | 0.037 |
| 47 | hsa04270 | 0.037 |
| 48 | hsa04066 | 0.037 |
| 49 | hsa04360 | 0.036 |
| 50 | hsa05120 | 0.036 |
| 51 | hsa04750 | 0.036 |
| 52 | hsa00240 | 0.035 |
| 53 | hsa04930 | 0.035 |
| 54 | hsa04660 | 0.035 |
| 55 | hsa04919 | 0.035 |
| 56 | hsa04320 | 0.034 |
| 57 | hsa05169 | 0.034 |
| 58 | hsa04150 | 0.034 |
| 59 | hsa04914 | 0.033 |
| 60 | hsa05031 | 0.033 |
| 61 | hsa04664 | 0.033 |
| 62 | hsa05412 | 0.033 |
| 63 | hsa05216 | 0.032 |
| 64 | hsa03018 | 0.032 |

|    |          |       |
|----|----------|-------|
| 65 | hsa04910 | 0.032 |
| 66 | hsa05032 | 0.032 |
| 67 | hsa04260 | 0.031 |
| 68 | hsa04912 | 0.03  |
| 69 | hsa05161 | 0.03  |
| 70 | hsa04713 | 0.029 |
| 71 | hsa04670 | 0.029 |
| 72 | hsa04380 | 0.029 |
| 73 | hsa05030 | 0.029 |
| 74 | hsa03020 | 0.029 |
| 75 | hsa05130 | 0.029 |
| 76 | hsa05131 | 0.028 |
| 77 | hsa05414 | 0.028 |
| 78 | hsa05211 | 0.028 |
| 79 | hsa04720 | 0.027 |
| 80 | hsa04110 | 0.026 |
| 81 | hsa04114 | 0.026 |
| 82 | hsa05168 | 0.026 |
| 83 | hsa04530 | 0.026 |
| 84 | hsa04921 | 0.026 |
| 85 | hsa04064 | 0.026 |
| 86 | hsa03320 | 0.026 |

|     |          |       |
|-----|----------|-------|
| 87  | hsa05164 | 0.026 |
| 88  | hsa04666 | 0.025 |
| 89  | hsa04978 | 0.025 |
| 90  | hsa05145 | 0.025 |
| 91  | hsa05012 | 0.024 |
| 92  | hsa04724 | 0.024 |
| 93  | hsa00910 | 0.024 |
| 94  | hsa00590 | 0.024 |
| 95  | hsa04913 | 0.024 |
| 96  | hsa04971 | 0.024 |
| 97  | hsa00630 | 0.024 |
| 98  | hsa05100 | 0.024 |
| 99  | hsa04662 | 0.024 |
| 100 | hsa04920 | 0.023 |
| 101 | hsa04620 | 0.023 |
| 102 | hsa05210 | 0.023 |
| 103 | hsa04974 | 0.023 |
| 104 | hsa04115 | 0.022 |
| 105 | hsa00591 | 0.022 |
| 106 | hsa04630 | 0.022 |
| 107 | hsa00140 | 0.022 |
| 108 | hsa05222 | 0.022 |

|     |          |       |
|-----|----------|-------|
| 109 | hsa04614 | 0.021 |
| 110 | hsa04623 | 0.021 |
| 111 | hsa04977 | 0.021 |
| 112 | hsa04730 | 0.021 |
| 113 | hsa00790 | 0.021 |
| 114 | hsa04964 | 0.021 |
| 115 | hsa05203 | 0.021 |
| 116 | hsa05323 | 0.021 |
| 117 | hsa00670 | 0.021 |
| 118 | hsa05144 | 0.02  |
| 119 | hsa04622 | 0.02  |
| 120 | hsa03420 | 0.02  |
| 121 | hsa05166 | 0.02  |
| 122 | hsa05132 | 0.02  |
| 123 | hsa04742 | 0.02  |
| 124 | hsa04744 | 0.02  |
| 125 | hsa03460 | 0.02  |
| 126 | hsa04610 | 0.019 |
| 127 | hsa03440 | 0.019 |
| 128 | hsa00561 | 0.019 |
| 129 | hsa04966 | 0.019 |
| 130 | hsa04350 | 0.019 |

|     |          |       |
|-----|----------|-------|
| 131 | hsa05034 | 0.019 |
| 132 | hsa05410 | 0.019 |
| 133 | hsa04973 | 0.018 |
| 134 | hsa00650 | 0.018 |
| 135 | hsa00531 | 0.018 |
| 136 | hsa00520 | 0.018 |
| 137 | hsa04140 | 0.018 |
| 138 | hsa05142 | 0.018 |
| 139 | hsa05020 | 0.017 |
| 140 | hsa04975 | 0.017 |
| 141 | hsa04916 | 0.017 |
| 142 | hsa04668 | 0.017 |
| 143 | hsa05134 | 0.017 |
| 144 | hsa05143 | 0.017 |
| 145 | hsa04640 | 0.017 |
| 146 | hsa04740 | 0.017 |
| 147 | hsa04310 | 0.016 |
| 148 | hsa01040 | 0.016 |
| 149 | hsa05416 | 0.016 |
| 150 | hsa04340 | 0.016 |
| 151 | hsa04721 | 0.016 |
| 152 | hsa05152 | 0.016 |

|     |          |       |
|-----|----------|-------|
| 153 | hsa05146 | 0.016 |
| 154 | hsa00232 | 0.016 |
| 155 | hsa04611 | 0.016 |
| 156 | hsa04210 | 0.016 |
| 157 | hsa05140 | 0.016 |
| 158 | hsa00120 | 0.016 |
| 159 | hsa02010 | 0.015 |
| 160 | hsa04142 | 0.015 |
| 161 | hsa04621 | 0.015 |
| 162 | hsa04932 | 0.015 |
| 163 | hsa03060 | 0.015 |
| 164 | hsa00982 | 0.015 |
| 165 | hsa00533 | 0.015 |
| 166 | hsa00592 | 0.014 |
| 167 | hsa00190 | 0.014 |
| 168 | hsa04120 | 0.014 |
| 169 | hsa00230 | 0.014 |
| 170 | hsa05110 | 0.014 |
| 171 | hsa04145 | 0.014 |
| 172 | hsa00983 | 0.014 |
| 173 | hsa00830 | 0.013 |
| 174 | hsa00980 | 0.013 |

|     |          |       |
|-----|----------|-------|
| 175 | hsa00061 | 0.013 |
| 176 | hsa04710 | 0.013 |
| 177 | hsa05321 | 0.013 |
| 178 | hsa05204 | 0.013 |
| 179 | hsa03430 | 0.013 |
| 180 | hsa00330 | 0.013 |
| 181 | hsa05010 | 0.013 |
| 182 | hsa05016 | 0.013 |
| 183 | hsa03410 | 0.013 |
| 184 | hsa04146 | 0.012 |
| 185 | hsa03022 | 0.012 |
| 186 | hsa00740 | 0.012 |
| 187 | hsa00770 | 0.012 |
| 188 | hsa00562 | 0.012 |
| 189 | hsa05320 | 0.012 |
| 190 | hsa05217 | 0.012 |
| 191 | hsa00460 | 0.012 |
| 192 | hsa03013 | 0.012 |
| 193 | hsa00280 | 0.012 |
| 194 | hsa00052 | 0.012 |
| 195 | hsa04390 | 0.012 |
| 196 | hsa05332 | 0.012 |

|     |          |       |
|-----|----------|-------|
| 197 | hsa00620 | 0.012 |
| 198 | hsa00340 | 0.011 |
| 199 | hsa00512 | 0.011 |
| 200 | hsa04915 | 0.011 |
| 201 | hsa04070 | 0.011 |
| 202 | hsa04972 | 0.011 |
| 203 | hsa00030 | 0.011 |
| 204 | hsa00040 | 0.011 |
| 205 | hsa00380 | 0.011 |
| 206 | hsa03010 | 0.011 |
| 207 | hsa00130 | 0.01  |
| 208 | hsa04976 | 0.01  |
| 209 | hsa04330 | 0.01  |
| 210 | hsa00400 | 0.01  |
| 211 | hsa05150 | 0.01  |
| 212 | hsa00072 | 0.01  |
| 213 | hsa04514 | 0.01  |
| 214 | hsa04612 | 0.01  |
| 215 | hsa04940 | 0.01  |
| 216 | hsa03008 | 0.01  |
| 217 | hsa05133 | 0.01  |
| 218 | hsa00920 | 0.01  |

|     |          |       |
|-----|----------|-------|
| 219 | hsa00785 | 0.01  |
| 220 | hsa05014 | 0.01  |
| 221 | hsa00270 | 0.01  |
| 222 | hsa00010 | 0.01  |
| 223 | hsa04141 | 0.01  |
| 224 | hsa00511 | 0.009 |
| 225 | hsa04512 | 0.009 |
| 226 | hsa03450 | 0.009 |
| 227 | hsa05330 | 0.009 |
| 228 | hsa03030 | 0.009 |
| 229 | hsa00970 | 0.009 |
| 230 | hsa00480 | 0.009 |
| 231 | hsa05310 | 0.009 |
| 232 | hsa00860 | 0.009 |
| 233 | hsa05322 | 0.009 |
| 234 | hsa00051 | 0.009 |
| 235 | hsa00310 | 0.009 |
| 236 | hsa00640 | 0.008 |
| 237 | hsa00053 | 0.008 |
| 238 | hsa04918 | 0.008 |
| 239 | hsa04122 | 0.008 |
| 240 | hsa04962 | 0.008 |

|     |          |       |
|-----|----------|-------|
| 241 | hsa04130 | 0.008 |
| 242 | hsa00900 | 0.007 |
| 243 | hsa00250 | 0.007 |
| 244 | hsa00430 | 0.007 |
| 245 | hsa00514 | 0.007 |
| 246 | hsa00260 | 0.007 |
| 247 | hsa00600 | 0.007 |
| 248 | hsa00410 | 0.007 |
| 249 | hsa00500 | 0.007 |
| 250 | hsa03050 | 0.006 |
| 251 | hsa00601 | 0.006 |
| 252 | hsa00564 | 0.006 |
| 253 | hsa00062 | 0.006 |
| 254 | hsa04672 | 0.006 |
| 255 | hsa00471 | 0.005 |
| 256 | hsa00534 | 0.005 |
| 257 | hsa00565 | 0.005 |
| 258 | hsa00071 | 0.005 |
| 259 | hsa00360 | 0.005 |
| 260 | hsa00760 | 0.004 |
| 261 | hsa04950 | 0.004 |
| 262 | hsa00780 | 0.004 |

|     |          |       |
|-----|----------|-------|
| 263 | hsa00350 | 0.004 |
| 264 | hsa00510 | 0.004 |
| 265 | hsa03040 | 0.004 |
| 266 | hsa00750 | 0.004 |
| 267 | hsa00100 | 0.004 |
| 268 | hsa00532 | 0.003 |
| 269 | hsa00563 | 0.003 |
| 270 | hsa00450 | 0.003 |
| 271 | hsa03015 | 0.002 |
| 272 | hsa00020 | 0.002 |
| 273 | hsa00524 | 0.002 |
| 274 | hsa00604 | 0.002 |
| 275 | hsa00730 | 0.002 |
| 276 | hsa00300 | 0.002 |
| 277 | hsa00603 | 0.001 |
| 278 | hsa00290 | 0.001 |
