# Supplementary material for: Gene Ontology and KEGG Pathway Enrichment Analysis of a Drug Target-Based Classification System
Source: PubMed Central journal article supplement (PMC4423955; doi:10.1371/journal.pone.0126492), 2015-05-07
Supplement: pone.0126492.s003.pdf [file pone.0126492.s003.pdf]

**S3 Table.** The MaxRel feature list for the features about GO terms.

| <b>Rank</b> | <b>Feature name</b> | <b>Score</b> |
|-------------|---------------------|--------------|
| 1           | GO:0034702          | 0.138        |
| 2           | GO:0060603          | 0.136        |
| 3           | GO:0060745          | 0.133        |
| 4           | GO:0004935          | 0.131        |
| 5           | GO:0001993          | 0.131        |
| 6           | GO:0001997          | 0.13         |
| 7           | GO:1902495          | 0.129        |
| 8           | GO:0031694          | 0.128        |
| 9           | GO:0003707          | 0.128        |
| 10          | GO:0071875          | 0.128        |
| 11          | GO:0005496          | 0.127        |
| 12          | GO:0003099          | 0.127        |
| 13          | GO:0031690          | 0.125        |
| 14          | GO:0045986          | 0.125        |
| 15          | GO:0045932          | 0.124        |
| 16          | GO:0060443          | 0.123        |
| 17          | GO:0046877          | 0.122        |
| 18          | GO:0051379          | 0.119        |
| 19          | GO:0005216          | 0.119        |
| 20          | GO:1901338          | 0.117        |

|    |            |       |
|----|------------|-------|
| 21 | GO:0003085 | 0.117 |
| 22 | GO:0022838 | 0.115 |
| 23 | GO:0001996 | 0.112 |
| 24 | GO:0015267 | 0.112 |
| 25 | GO:0022803 | 0.112 |
| 26 | GO:0060444 | 0.111 |
| 27 | GO:0022836 | 0.111 |
| 28 | GO:0051967 | 0.111 |
| 29 | GO:0015459 | 0.11  |
| 30 | GO:0060080 | 0.109 |
| 31 | GO:0098531 | 0.107 |
| 32 | GO:0004879 | 0.107 |
| 33 | GO:0060748 | 0.105 |
| 34 | GO:0022401 | 0.104 |
| 35 | GO:0023058 | 0.104 |
| 36 | GO:0002029 | 0.104 |
| 37 | GO:0045761 | 0.104 |
| 38 | GO:0042596 | 0.102 |
| 39 | GO:0045760 | 0.101 |
| 40 | GO:0045980 | 0.1   |
| 41 | GO:1900543 | 0.1   |
| 42 | GO:0003057 | 0.1   |

|    |            |       |
|----|------------|-------|
| 43 | GO:0046878 | 0.1   |
| 44 | GO:0048806 | 0.1   |
| 45 | GO:0032229 | 0.1   |
| 46 | GO:0060740 | 0.099 |
| 47 | GO:0030800 | 0.099 |
| 48 | GO:0001965 | 0.099 |
| 49 | GO:0045744 | 0.098 |
| 50 | GO:0007193 | 0.098 |
| 51 | GO:0004939 | 0.098 |
| 52 | GO:0002025 | 0.098 |
| 53 | GO:0030815 | 0.098 |
| 54 | GO:0030518 | 0.097 |
| 55 | GO:0060512 | 0.097 |
| 56 | GO:0002024 | 0.097 |
| 57 | GO:0008179 | 0.097 |
| 58 | GO:0007210 | 0.096 |
| 59 | GO:0030850 | 0.096 |
| 60 | GO:0048149 | 0.095 |
| 61 | GO:0051380 | 0.095 |
| 62 | GO:0050951 | 0.095 |
| 63 | GO:0051481 | 0.094 |
| 64 | GO:0061377 | 0.094 |

|    |            |       |
|----|------------|-------|
| 65 | GO:0060749 | 0.094 |
| 66 | GO:0060742 | 0.094 |
| 67 | GO:0060736 | 0.094 |
| 68 | GO:0004993 | 0.094 |
| 69 | GO:0040015 | 0.093 |
| 70 | GO:0050432 | 0.093 |
| 71 | GO:0003056 | 0.093 |
| 72 | GO:0031280 | 0.092 |
| 73 | GO:1901020 | 0.092 |
| 74 | GO:0014059 | 0.092 |
| 75 | GO:0014046 | 0.092 |
| 76 | GO:0002031 | 0.092 |
| 77 | GO:0008227 | 0.092 |
| 78 | GO:0030520 | 0.092 |
| 79 | GO:0050433 | 0.092 |
| 80 | GO:0007191 | 0.091 |
| 81 | GO:0030809 | 0.091 |
| 82 | GO:1900372 | 0.091 |
| 83 | GO:0030803 | 0.091 |
| 84 | GO:0045776 | 0.091 |
| 85 | GO:0004883 | 0.091 |
| 86 | GO:0051350 | 0.091 |

|     |            |       |
|-----|------------|-------|
| 87  | GO:0060359 | 0.091 |
| 88  | GO:0007194 | 0.091 |
| 89  | GO:0007268 | 0.091 |
| 90  | GO:0043950 | 0.09  |
| 91  | GO:0030818 | 0.09  |
| 92  | GO:0035809 | 0.09  |
| 93  | GO:0005980 | 0.09  |
| 94  | GO:0009251 | 0.09  |
| 95  | GO:0098900 | 0.09  |
| 96  | GO:0051378 | 0.09  |
| 97  | GO:0048148 | 0.09  |
| 98  | GO:0051937 | 0.09  |
| 99  | GO:0042220 | 0.089 |
| 100 | GO:0022612 | 0.089 |
| 101 | GO:0003321 | 0.089 |
| 102 | GO:0035811 | 0.089 |
| 103 | GO:0015075 | 0.088 |
| 104 | GO:0043176 | 0.088 |
| 105 | GO:0002021 | 0.088 |
| 106 | GO:0014848 | 0.087 |
| 107 | GO:0006367 | 0.087 |
| 108 | GO:0045762 | 0.086 |

|     |            |       |
|-----|------------|-------|
| 109 | GO:0060081 | 0.086 |
| 110 | GO:0015872 | 0.086 |
| 111 | GO:0051952 | 0.086 |
| 112 | GO:0006939 | 0.086 |
| 113 | GO:0060687 | 0.086 |
| 114 | GO:0006936 | 0.086 |
| 115 | GO:0060599 | 0.085 |
| 116 | GO:0051339 | 0.085 |
| 117 | GO:0010460 | 0.085 |
| 118 | GO:0046541 | 0.085 |
| 119 | GO:0007198 | 0.085 |
| 120 | GO:0006352 | 0.085 |
| 121 | GO:0022891 | 0.085 |
| 122 | GO:0031946 | 0.084 |
| 123 | GO:0060158 | 0.084 |
| 124 | GO:0044247 | 0.084 |
| 125 | GO:0043567 | 0.084 |
| 126 | GO:0022857 | 0.084 |
| 127 | GO:0051583 | 0.084 |
| 128 | GO:0051934 | 0.084 |
| 129 | GO:0090493 | 0.084 |
| 130 | GO:0090494 | 0.084 |

|     |            |       |
|-----|------------|-------|
| 131 | GO:0014832 | 0.084 |
| 132 | GO:0071073 | 0.084 |
| 133 | GO:0032412 | 0.084 |
| 134 | GO:0060514 | 0.084 |
| 135 | GO:0019102 | 0.084 |
| 136 | GO:0045720 | 0.084 |
| 137 | GO:0070974 | 0.084 |
| 138 | GO:0060520 | 0.084 |
| 139 | GO:0051940 | 0.084 |
| 140 | GO:0051584 | 0.084 |
| 141 | GO:0006940 | 0.084 |
| 142 | GO:0007188 | 0.084 |
| 143 | GO:0004941 | 0.084 |
| 144 | GO:0007270 | 0.084 |
| 145 | GO:0007212 | 0.083 |
| 146 | GO:0002032 | 0.083 |
| 147 | GO:0007195 | 0.083 |
| 148 | GO:0022892 | 0.083 |
| 149 | GO:0007208 | 0.083 |
| 150 | GO:0071886 | 0.083 |
| 151 | GO:0001994 | 0.083 |
| 152 | GO:0061180 | 0.083 |

|     |            |       |
|-----|------------|-------|
| 153 | GO:0035239 | 0.083 |
| 154 | GO:0060562 | 0.083 |
| 155 | GO:0008289 | 0.083 |
| 156 | GO:0042310 | 0.082 |
| 157 | GO:0001591 | 0.082 |
| 158 | GO:0004940 | 0.082 |
| 159 | GO:0003061 | 0.082 |
| 160 | GO:0031943 | 0.082 |
| 161 | GO:0031279 | 0.082 |
| 162 | GO:0051482 | 0.082 |
| 163 | GO:0007190 | 0.082 |
| 164 | GO:0055023 | 0.082 |
| 165 | GO:0061051 | 0.082 |
| 166 | GO:0033604 | 0.082 |
| 167 | GO:0060134 | 0.082 |
| 168 | GO:1900133 | 0.081 |
| 169 | GO:0022898 | 0.081 |
| 170 | GO:0015837 | 0.081 |
| 171 | GO:0010513 | 0.081 |
| 172 | GO:0000981 | 0.081 |
| 173 | GO:0007626 | 0.081 |
| 174 | GO:0015844 | 0.081 |

|     |            |       |
|-----|------------|-------|
| 175 | GO:0038052 | 0.081 |
| 176 | GO:0008277 | 0.081 |
| 177 | GO:1900135 | 0.081 |
| 178 | GO:0051932 | 0.08  |
| 179 | GO:0014827 | 0.08  |
| 180 | GO:0030814 | 0.08  |
| 181 | GO:0018993 | 0.08  |
| 182 | GO:0033267 | 0.08  |
| 183 | GO:0043266 | 0.08  |
| 184 | GO:0045823 | 0.08  |
| 185 | GO:0014831 | 0.08  |
| 186 | GO:0004952 | 0.08  |
| 187 | GO:0035112 | 0.079 |
| 188 | GO:0048808 | 0.079 |
| 189 | GO:0060685 | 0.079 |
| 190 | GO:0005261 | 0.079 |
| 191 | GO:0002001 | 0.079 |
| 192 | GO:0071071 | 0.079 |
| 193 | GO:0001547 | 0.079 |
| 194 | GO:0034703 | 0.079 |
| 195 | GO:0070472 | 0.079 |
| 196 | GO:0010511 | 0.079 |

|     |            |       |
|-----|------------|-------|
| 197 | GO:0060442 | 0.079 |
| 198 | GO:0030284 | 0.079 |
| 199 | GO:0005215 | 0.079 |
| 200 | GO:0032413 | 0.079 |
| 201 | GO:0051953 | 0.079 |
| 202 | GO:0043679 | 0.079 |
| 203 | GO:0030817 | 0.079 |
| 204 | GO:0060527 | 0.079 |
| 205 | GO:0060526 | 0.079 |
| 206 | GO:0045112 | 0.079 |
| 207 | GO:0043568 | 0.079 |
| 208 | GO:0060513 | 0.078 |
| 209 | GO:0006171 | 0.078 |
| 210 | GO:0004713 | 0.078 |
| 211 | GO:0007628 | 0.078 |
| 212 | GO:0035240 | 0.078 |
| 213 | GO:0034776 | 0.078 |
| 214 | GO:0030522 | 0.078 |
| 215 | GO:0048386 | 0.078 |
| 216 | GO:0004936 | 0.078 |
| 217 | GO:0060750 | 0.078 |
| 218 | GO:0060601 | 0.078 |

|     |            |       |
|-----|------------|-------|
| 219 | GO:0004882 | 0.078 |
| 220 | GO:0007187 | 0.078 |
| 221 | GO:0060571 | 0.078 |
| 222 | GO:0045945 | 0.078 |
| 223 | GO:0060525 | 0.078 |
| 224 | GO:0043278 | 0.078 |
| 225 | GO:0044306 | 0.078 |
| 226 | GO:0045113 | 0.078 |
| 227 | GO:0045726 | 0.078 |
| 228 | GO:0015874 | 0.078 |
| 229 | GO:0030594 | 0.078 |
| 230 | GO:0007205 | 0.077 |
| 231 | GO:0002209 | 0.077 |
| 232 | GO:0001662 | 0.077 |
| 233 | GO:0035640 | 0.077 |
| 234 | GO:0034765 | 0.077 |
| 235 | GO:0007189 | 0.077 |
| 236 | GO:0040014 | 0.077 |
| 237 | GO:0032410 | 0.077 |
| 238 | GO:0001975 | 0.077 |
| 239 | GO:0030534 | 0.077 |
| 240 | GO:0034056 | 0.077 |

|     |            |       |
|-----|------------|-------|
| 241 | GO:0032414 | 0.077 |
| 242 | GO:0070852 | 0.077 |
| 243 | GO:0071502 | 0.076 |
| 244 | GO:0070471 | 0.076 |
| 245 | GO:0048243 | 0.076 |
| 246 | GO:0000272 | 0.076 |
| 247 | GO:0090030 | 0.076 |
| 248 | GO:0060456 | 0.076 |
| 249 | GO:0045777 | 0.076 |
| 250 | GO:1901386 | 0.076 |
| 251 | GO:0003084 | 0.076 |
| 252 | GO:0009152 | 0.076 |
| 253 | GO:0050805 | 0.076 |
| 254 | GO:0034220 | 0.075 |
| 255 | GO:0010459 | 0.075 |
| 256 | GO:0014854 | 0.075 |
| 257 | GO:0007285 | 0.075 |
| 258 | GO:0004930 | 0.075 |
| 259 | GO:0043949 | 0.075 |
| 260 | GO:0002026 | 0.075 |
| 261 | GO:0060523 | 0.075 |
| 262 | GO:0060073 | 0.075 |

|     |            |       |
|-----|------------|-------|
| 263 | GO:0030054 | 0.075 |
| 264 | GO:0008013 | 0.075 |
| 265 | GO:0019199 | 0.075 |
| 266 | GO:0001964 | 0.075 |
| 267 | GO:0048242 | 0.075 |
| 268 | GO:0052652 | 0.075 |
| 269 | GO:0009190 | 0.075 |
| 270 | GO:0033145 | 0.075 |
| 271 | GO:0033148 | 0.075 |
| 272 | GO:0032409 | 0.075 |
| 273 | GO:0060737 | 0.075 |
| 274 | GO:0010700 | 0.075 |
| 275 | GO:0006359 | 0.075 |
| 276 | GO:0046545 | 0.075 |
| 277 | GO:0033602 | 0.074 |
| 278 | GO:0055025 | 0.074 |
| 279 | GO:0014061 | 0.074 |
| 280 | GO:0004714 | 0.074 |
| 281 | GO:0046676 | 0.074 |
| 282 | GO:0015276 | 0.074 |
| 283 | GO:0022834 | 0.074 |
| 284 | GO:0032811 | 0.074 |

|     |            |       |
|-----|------------|-------|
| 285 | GO:0051588 | 0.074 |
| 286 | GO:0001587 | 0.074 |
| 287 | GO:0014060 | 0.074 |
| 288 | GO:0051580 | 0.074 |
| 289 | GO:0009260 | 0.074 |
| 290 | GO:0014821 | 0.074 |
| 291 | GO:0046873 | 0.074 |
| 292 | GO:0003044 | 0.074 |
| 293 | GO:0003025 | 0.074 |
| 294 | GO:0051349 | 0.073 |
| 295 | GO:0031281 | 0.073 |
| 296 | GO:0051586 | 0.073 |
| 297 | GO:0051944 | 0.073 |
| 298 | GO:0051582 | 0.073 |
| 299 | GO:0004888 | 0.073 |
| 300 | GO:0002027 | 0.073 |
| 301 | GO:0070473 | 0.073 |
| 302 | GO:0006265 | 0.073 |
| 303 | GO:0005887 | 0.073 |
| 304 | GO:0031226 | 0.073 |
| 305 | GO:0004937 | 0.072 |
| 306 | GO:0004938 | 0.072 |

|     |            |       |
|-----|------------|-------|
| 307 | GO:0071883 | 0.072 |
| 308 | GO:0001978 | 0.072 |
| 309 | GO:0048384 | 0.072 |
| 310 | GO:0032228 | 0.072 |
| 311 | GO:0001541 | 0.072 |
| 312 | GO:0071880 | 0.072 |
| 313 | GO:0060160 | 0.072 |
| 314 | GO:0060372 | 0.072 |
| 315 | GO:2001257 | 0.072 |
| 316 | GO:0090325 | 0.072 |
| 317 | GO:0003918 | 0.072 |
| 318 | GO:0061505 | 0.072 |
| 319 | GO:0031692 | 0.071 |
| 320 | GO:0030521 | 0.071 |
| 321 | GO:0021894 | 0.071 |
| 322 | GO:0021830 | 0.071 |
| 323 | GO:0021853 | 0.071 |
| 324 | GO:0007200 | 0.071 |
| 325 | GO:0035625 | 0.071 |
| 326 | GO:0014072 | 0.071 |
| 327 | GO:0060421 | 0.071 |
| 328 | GO:0002009 | 0.071 |

|     |            |       |
|-----|------------|-------|
| 329 | GO:0006164 | 0.071 |
| 330 | GO:0060004 | 0.071 |
| 331 | GO:0071882 | 0.071 |
| 332 | GO:0071881 | 0.071 |
| 333 | GO:0071878 | 0.071 |
| 334 | GO:0060135 | 0.071 |
| 335 | GO:0030315 | 0.071 |
| 336 | GO:0003916 | 0.071 |
| 337 | GO:0086003 | 0.071 |
| 338 | GO:0086015 | 0.071 |
| 339 | GO:0086018 | 0.071 |
| 340 | GO:0008585 | 0.07  |
| 341 | GO:0007638 | 0.07  |
| 342 | GO:0086012 | 0.07  |
| 343 | GO:0006937 | 0.07  |
| 344 | GO:0031987 | 0.07  |
| 345 | GO:0048754 | 0.07  |
| 346 | GO:0035815 | 0.07  |
| 347 | GO:0046777 | 0.07  |
| 348 | GO:0048755 | 0.07  |
| 349 | GO:0008022 | 0.07  |
| 350 | GO:0004716 | 0.07  |

|     |            |       |
|-----|------------|-------|
| 351 | GO:0051208 | 0.069 |
| 352 | GO:0010996 | 0.069 |
| 353 | GO:0030432 | 0.069 |
| 354 | GO:0035624 | 0.069 |
| 355 | GO:0007267 | 0.069 |
| 356 | GO:0051954 | 0.069 |
| 357 | GO:0050681 | 0.069 |
| 358 | GO:0051966 | 0.069 |
| 359 | GO:0003012 | 0.069 |
| 360 | GO:0086070 | 0.069 |
| 361 | GO:0032795 | 0.069 |
| 362 | GO:0060572 | 0.069 |
| 363 | GO:0019838 | 0.069 |
| 364 | GO:0046390 | 0.069 |
| 365 | GO:0007171 | 0.069 |
| 366 | GO:0048241 | 0.069 |
| 367 | GO:0001963 | 0.069 |
| 368 | GO:0086019 | 0.069 |
| 369 | GO:0050955 | 0.069 |
| 370 | GO:0008306 | 0.069 |
| 371 | GO:0022890 | 0.068 |
| 372 | GO:0060384 | 0.068 |

|     |            |       |
|-----|------------|-------|
| 373 | GO:0005244 | 0.068 |
| 374 | GO:0022832 | 0.068 |
| 375 | GO:0042698 | 0.068 |
| 376 | GO:0004672 | 0.068 |
| 377 | GO:0060068 | 0.068 |
| 378 | GO:0033555 | 0.068 |
| 379 | GO:0016773 | 0.068 |
| 380 | GO:0016301 | 0.068 |
| 381 | GO:0016772 | 0.068 |
| 382 | GO:0030238 | 0.068 |
| 383 | GO:0045741 | 0.068 |
| 384 | GO:0001985 | 0.068 |
| 385 | GO:1900273 | 0.068 |
| 386 | GO:2001258 | 0.068 |
| 387 | GO:0035264 | 0.068 |
| 388 | GO:0008016 | 0.068 |
| 389 | GO:0006812 | 0.068 |
| 390 | GO:0007530 | 0.068 |
| 391 | GO:0030819 | 0.068 |
| 392 | GO:0016740 | 0.068 |
| 393 | GO:0031623 | 0.067 |
| 394 | GO:0001976 | 0.067 |

|     |            |       |
|-----|------------|-------|
| 395 | GO:0042383 | 0.067 |
| 396 | GO:0050961 | 0.067 |
| 397 | GO:0050965 | 0.067 |
| 398 | GO:0014829 | 0.067 |
| 399 | GO:0072522 | 0.067 |
| 400 | GO:0050877 | 0.067 |
| 401 | GO:0060159 | 0.067 |
| 402 | GO:0005057 | 0.067 |
| 403 | GO:0022843 | 0.067 |
| 404 | GO:0086065 | 0.066 |
| 405 | GO:0008324 | 0.066 |
| 406 | GO:0014075 | 0.066 |
| 407 | GO:0044260 | 0.066 |
| 408 | GO:0019035 | 0.066 |
| 409 | GO:0045870 | 0.066 |
| 410 | GO:0009330 | 0.066 |
| 411 | GO:0070474 | 0.066 |
| 412 | GO:0050880 | 0.066 |
| 413 | GO:0035150 | 0.066 |
| 414 | GO:0042659 | 0.066 |
| 415 | GO:0030431 | 0.066 |
| 416 | GO:0045202 | 0.066 |

|     |            |       |
|-----|------------|-------|
| 417 | GO:0022602 | 0.066 |
| 418 | GO:0032148 | 0.066 |
| 419 | GO:0001659 | 0.066 |
| 420 | GO:0090257 | 0.066 |
| 421 | GO:0001504 | 0.066 |
| 422 | GO:0035637 | 0.066 |
| 423 | GO:0035249 | 0.066 |
| 424 | GO:0002028 | 0.066 |
| 425 | GO:0030540 | 0.065 |
| 426 | GO:0043268 | 0.065 |
| 427 | GO:0007613 | 0.065 |
| 428 | GO:0046885 | 0.065 |
| 429 | GO:0090066 | 0.065 |
| 430 | GO:0033143 | 0.065 |
| 431 | GO:0032553 | 0.065 |
| 432 | GO:0032279 | 0.065 |
| 433 | GO:0051823 | 0.065 |
| 434 | GO:0007266 | 0.065 |
| 435 | GO:0021769 | 0.065 |
| 436 | GO:0003018 | 0.065 |
| 437 | GO:0030554 | 0.065 |
| 438 | GO:0060688 | 0.065 |

|     |            |       |
|-----|------------|-------|
| 439 | GO:0017076 | 0.065 |
| 440 | GO:0032555 | 0.065 |
| 441 | GO:0031224 | 0.065 |
| 442 | GO:0033146 | 0.065 |
| 443 | GO:0001820 | 0.064 |
| 444 | GO:0035825 | 0.064 |
| 445 | GO:0007131 | 0.064 |
| 446 | GO:0003015 | 0.064 |
| 447 | GO:0060047 | 0.064 |
| 448 | GO:0030816 | 0.064 |
| 449 | GO:0032549 | 0.064 |
| 450 | GO:0001882 | 0.064 |
| 451 | GO:0050998 | 0.064 |
| 452 | GO:0032225 | 0.064 |
| 453 | GO:0032550 | 0.064 |
| 454 | GO:0001883 | 0.064 |
| 455 | GO:0035639 | 0.064 |
| 456 | GO:0018108 | 0.064 |
| 457 | GO:0018212 | 0.064 |
| 458 | GO:0032467 | 0.064 |
| 459 | GO:0048729 | 0.064 |
| 460 | GO:0008333 | 0.064 |

|     |            |       |
|-----|------------|-------|
| 461 | GO:0030539 | 0.064 |
| 462 | GO:0048385 | 0.064 |
| 463 | GO:0038023 | 0.064 |
| 464 | GO:0043170 | 0.064 |
| 465 | GO:0061458 | 0.064 |
| 466 | GO:0016247 | 0.064 |
| 467 | GO:0097195 | 0.063 |
| 468 | GO:0014062 | 0.063 |
| 469 | GO:0060751 | 0.063 |
| 470 | GO:0051590 | 0.063 |
| 471 | GO:1900271 | 0.063 |
| 472 | GO:0035258 | 0.063 |
| 473 | GO:0005524 | 0.063 |
| 474 | GO:0030804 | 0.063 |
| 475 | GO:0060406 | 0.063 |
| 476 | GO:0021892 | 0.063 |
| 477 | GO:0060065 | 0.063 |
| 478 | GO:0044456 | 0.063 |
| 479 | GO:0008344 | 0.063 |
| 480 | GO:1901385 | 0.063 |
| 481 | GO:0006312 | 0.063 |
| 482 | GO:0001046 | 0.063 |

|     |            |       |
|-----|------------|-------|
| 483 | GO:0031696 | 0.063 |
| 484 | GO:0030424 | 0.063 |
| 485 | GO:0032559 | 0.063 |
| 486 | GO:1902305 | 0.063 |
| 487 | GO:0046058 | 0.063 |
| 488 | GO:0030799 | 0.063 |
| 489 | GO:0007600 | 0.062 |
| 490 | GO:0034762 | 0.062 |
| 491 | GO:0046488 | 0.062 |
| 492 | GO:2000273 | 0.062 |
| 493 | GO:0030810 | 0.062 |
| 494 | GO:1900373 | 0.062 |
| 495 | GO:0005021 | 0.062 |
| 496 | GO:0042428 | 0.062 |
| 497 | GO:1901019 | 0.062 |
| 498 | GO:0000712 | 0.062 |
| 499 | GO:0007608 | 0.062 |
| 500 | GO:0051307 | 0.062 |
